1           **A Genome-Wide Association Study Identifies SNP Markers for Virulence in**  
2                           ***Magnaporthe oryzae* Isolates from Sub-Saharan Africa**

3  
4   VEENA DEVI GANESHAN<sup>1</sup>, STEPHEN O. OPIYO<sup>1</sup>, SAMUEL K. MUTIGA<sup>2□</sup>, FELIX  
5   ROTICH<sup>2&</sup>, DAVID M. THURANIRA<sup>3¥</sup>, VINCENT M. WERE<sup>3#</sup>, IBRAHIMA  
6   OUÉDRAOGO<sup>4</sup>, BO ZHOU<sup>5</sup>, DARREN M. SOANES<sup>3</sup>, JAMES C. CORRELL<sup>2</sup>, GUO-  
7   LIANG WANG<sup>1</sup>, NICHOLAS J. TALBOT<sup>3#</sup>, and THOMAS K. MITCHELL<sup>1\*</sup>

8   **Affiliations:**

- 9       1) Department of Plant Pathology, The Ohio State University-Columbus, USA.  
10      2) Department of Plant Pathology, University of Arkansas-Fayetteville, USA.  
11      3) Biosciences Department, Exeter University, UK.  
12      4) Institute of Environment and Agricultural Research, Bobo-Dioulasso, Burkina  
13         Faso.  
14      5) International Rice Research Institute (IRRI), Philippines.

15   **Present Address:**

- 16       #The Sainsbury Laboratory, Norwich Research Park, NR4 7UH  
17       □Biosciences eastern and central Africa-international Livestock Research  
18       Institute (BecA-ILRI) Hub. International Livestock Research Institute Complex  
19       Building, Nairobi, Kenya.  
20       ¥Kenya Agricultural and Livestock Research Organisation (KALRO)-Kandara,  
21       Kenya.  
22       &University of Embu, Kenya.

24   **Corresponding author:** Dr. Thomas K. Mitchell, ([mitchell.815@osu.edu](mailto:mitchell.815@osu.edu))

29 **ABSTRACT**

30 The fungal phytopathogen *Magnaporthe oryzae* causes blast disease in cereals such as  
31 rice and finger millet worldwide. In this study, we assessed genetic diversity of 160  
32 isolates from nine sub-Saharan Africa (SSA) and other principal rice producing  
33 countries and conducted a genome-wide association study (GWAS) to identify the  
34 genomic regions associated with virulence of *M. oryzae*. GBS of isolates provided a  
35 large and high-quality 617K single nucleotide polymorphism (SNP) dataset. Disease  
36 ratings for each isolate was obtained by inoculating them onto differential lines and  
37 locally-adapted rice cultivars. Genome-wide association studies were conducted using  
38 the GBS dataset and sixteen disease rating datasets. Principal Component Analysis  
39 (PCA) was used as an alternative to population structure analysis for studying population  
40 stratification from genotypic data. A significant association between disease phenotype  
41 and 528 SNPs was observed in six GWA analyses. Homology of sequences  
42 encompassing the significant SNPs was determined to predict gene identities and  
43 functions. Seventeen genes recurred in six GWA analyses, suggesting a strong  
44 association with virulence. Here, the putative genes/genomic regions associated with  
45 the significant SNPs are presented.

46 **INTRODUCTION**

47 Rice is of increasing importance as a staple food crop in sub-Saharan Africa (SSA),  
48 particularly due to the rapidly growing urban population. (Amberwaves; Nigatu *et al.*,  
49 2017 USDA, 2017). Currently, 80% of rice production in SSA takes place in eight  
50 countries: Nigeria, Madagascar, Mali, Guinea, Côte d'Ivoire, Tanzania, Sierra Leone  
51 and Senegal with 20% from the rest of SSA. Nigeria and Madagascar alone account for

52 a third of SSA rice production. It is estimated that rice consumption in SSA will grow  
53 from the current 27-28 million tonnes to 36 million tonnes by the year 2026  
54 (Amberwaves; Nigatu *et al.*, 2017 USDA, 2017). Considering the predictions of rice  
55 consumption required to attain self-sufficiency, SSA will need to increase production by  
56 at least 10% per year for the next 10 years, or succumb to international rice trade with  
57 large imports impacting the economy of already financially fragile countries  
58 (Amberwaves; Nigatu *et al.*, 2017 USDA, 2017). Because of the increase in demand,  
59 several strategies are underway to increase rice production, which include increased  
60 usage of fertilizers, planting high-yielding cultivars and increasing the area of rice  
61 production (Balasubramanian *et al.*, 2007). In spite of efforts to increase production,  
62 biotic constraints such as damage by fungal pathogens, remain a major challenge  
63 towards achieving this food security goal. Recent statistics indicate that while the total  
64 rice harvest has grown at an average rate of 4.2% from 2007 to 2016, there are several  
65 abiotic and biotic stresses that restrict rice production, including rice blast disease  
66 (USDA 2017, Mgonja *et al.*, 2016, Mutiga *et al.*, 2017). Annual crop losses due to rice  
67 blast disease, caused by the fungus *Magnaporthe oryzae*, are reported to be up to 30%,  
68 with regional blast disease outbreaks causing up to 80% yield losses (Nalley *et al.*,  
69 2016). Another major challenge in enhancing rice production is that smallholder  
70 farmers, who cannot afford the cost of fungicides, are the major growers of rice (Saito *et*  
71 *al.*, 2013; Nalley *et al.*, 2016). Therefore, farmer-friendly technologies such as breeding  
72 for rice blast resistance and surveillance of the fungal pathogen are urgently needed  
73 (Mutiga *et al.*, 2017).

74 To breed for blast resistant rice, an understanding of the pathology and  
75 molecular interactions between the fungus and its host is required. Knowledge of the  
76 pathosystem is necessary and involves information of different lifestyles that fungi can  
77 adopt and their co-evolution with plants, which also reflects their biological diversity and  
78 worldwide distribution (Occhipinti, 2013). Owing to adaptations of both the pathogen  
79 and crop plants, plant-pathogen interactions differ significantly across agro-ecological  
80 systems. Building on the many studies that have begun to unravel the genetic basis of  
81 plant-fungal interactions, current work is aimed at identifying the molecular signatures  
82 for virulence (Burdon and Thrall, 2009). The rice blast pathosystem is a long-standing  
83 co-evolutionary model system, however, the molecular interactions between *M. oryzae*  
84 and rice has not been well studied using isolates from sub-Saharan Africa.

85 Hemibiotrophic fungal phytopathogens, such as *M. oryzae*, secrete effector  
86 proteins that counter plant defense signals and are key determinants of pathogenesis  
87 and virulence (Kamoun, 2007; Dodds *et al.*, 2009). Genomics-based effector discovery  
88 has identified genomic regions encoding effectors (Gibriel *et al.*, 2016). Plants in turn,  
89 exhibit recognition mechanisms that trigger production of resistance (*R*) proteins that  
90 directly, or indirectly, interact with effector molecules also called avirulence (*Avr*)  
91 proteins (Dodds and Rathjen, 2010; Petit-Houdénot and Fudal 2017). The activation of  
92 Effector-Triggered Immunity (ETI) in plants occurs upon the recognition of a pathogen  
93 *Avr* protein leading to a hypersensitive reaction (HR), which causes localized cell death,  
94 hence blocking disease progression (Jones and Dangl, 2006). This knowledge of *R-Avr*  
95 gene interaction is frequently utilized by scientists in breeding for superior crops that  
96 possess novel dominant resistance genes that cannot be infected by resident pathogen

97 races. Genetic control of blast disease therefore involves development of resistant rice  
98 cultivars that harbor major *R* genes (Petit-Houdenot and Fudal, 2017). There is however  
99 a significant risk of resistance breakdown because of the selection for *Avr* genes to  
100 mutate leading to loss of recognition by *R* gene products. To overcome this risk, a new  
101 strategy is to pyramid multiple *R* genes into a locally adapted rice variety (Mutiga *et al.*,  
102 2017; Pilet-Nayel *et al.*, 2017). More than 100 rice blast *R* genes have been identified in  
103 rice to date (Sharma *et al.*, 2012) and many of these have been cloned and  
104 characterized. The rice panel used in this GWAS includes lines harboring six major *R*  
105 genes (*Pia*, *Pita*, *Pi9*, *Pik*, *Pizt*, *Piz-5*) that have been functionally characterized and the  
106 *R* gene *Pi3* that is organized into a gene cluster with *Pii* (Wu *et al.*, 2015).

107         The advent of Next Generation Sequencing (NGS) and availability of fungal  
108 genomes has led to accelerated identification of *Avr* genes (Petit-Houdenot and Fudal  
109 2017). However, due to exertion of selection pressure by *R* genes, fungal pathogens  
110 very frequently become virulent through evolution of *Avr* genes. In such cases, virulence  
111 can be achieved by inactivation, down-regulation or complete deletion of the *Avr* gene,  
112 or simply generating point mutations such as single nucleotide polymorphisms (SNPs)  
113 that disable recognition (Guttman *et al.*, 2014; Jones and Dangl, 2006). Accessibility of  
114 whole genomes or reduced representation of genomes has enabled genome-level  
115 analysis of plant pathogens. Sequence variation is often used to identify complex traits  
116 in plants, animals and microorganisms. There are several high-throughput methods that  
117 combine NGS with reduced representation of genomes (Glaubitz *et al.*, 2014).  
118 Genotyping-by-sequencing (GBS) is a simple, robust multiplex method that generates  
119 large numbers of SNPs at very low cost (Elshire *et al.*, 2011). GBS has been mostly

120 used to study host plants (Torkamaneh *et al.*, 2017; Fernandez-Mazuecos *et al.*, 2017;  
121 Hussain *et al.*, 2017) because of the emphasis on resistance, however this technique  
122 can equally be applied to a pathogen. There are several combinatorial factors that can  
123 complicate the characterization of virulence in plant-pathogenic fungi, including genetic  
124 diversity present in natural populations, difficulty in conducting controlled crosses  
125 among genotypes, complexity of inheritance, inaccessibility to genomic information and  
126 the high costs associated with whole genome sequencing (Leboldus *et al.*, 2015). Using  
127 low cost GBS data can circumvent some of these issues (Leboldus *et al.*, 2015), and  
128 recent studies using GBS-based identification of quantitative trait loci in fungal  
129 pathogens have begun to emerge (Norelli *et al.*, 2017). GBS can be used to study  
130 population diversity and conduct Genome-wide Association Studies (GWAS) (Mjonga *et*  
131 *al.*, 2017).

132 GWAS is a potent tool used to detect genomic regions associated with natural  
133 variation in biological systems. This method is increasingly being used to study variation  
134 in plants, especially to fine map resistance genes in plants. However, GBS has only  
135 been sparingly used to detect genetic variants associated with pathogenicity/virulence in  
136 pathogens (Sanchez-Vallet *et al.*, 2017). In the last couple of years, GWAS has been  
137 utilized for successful identification of a wide range of alleles and candidate genes  
138 associated with disease or pathogenicity factors/phenotypes (Plissonneau *et al.*, 2017).  
139 There are more than 35 GWAS that have used SNPs as genetic markers for identifying  
140 genomic regions associated with plant response to pathogen infection (Bartoli and  
141 Roux, 2017) but only six of those GWAS reports on plant pathogens identified candidate  
142 pathogenicity determinants/genes. This includes one study of the bacterial pathogen

143 *Pseudomonas syringae* (Monteil *et al.*, 2016) and five GWAS on fungal  
144 phytopathogens; *Heterobasidion annosum* s.s., *Parastagonospora nodorum*, *Fusarium*  
145 *graminearum*, *Puccinia triticina* and *Zymoseptoria tritici* (Dalman *et al.*, 2013; Gao *et al.*,  
146 2016; Talas *et al.*, 2016, Wu *et al.*, 2017, Hartmann *et al.*, 2017). These studies were  
147 conducted to directly identify loci in the genome of the pathogen contributing to  
148 virulence.

149 Our previous research (Mutiga *et al.*, 2017) on the virulence spectrum and  
150 genetic diversity of *M. oryzae* samples from SSA suggested that regional breeding  
151 strategies would be required for East and West Africa based on the observed  
152 associations between genetic relatedness and virulence spectrum. The objectives of the  
153 current study are as follows;

- 154 1. To dissect the pathogen-host interaction for African collections of *M.*  
155 *oryzae* based on inoculations on genotypes carrying known *R*-genes
- 156 2. To discover new avirulence genes, which could be useful in providing  
157 insights onto how *M. oryzae* interacts with rice
- 158 3. To gain insight into pathogen-host co-evolution; through knowledge of  
159 shared virulence genes; to assist the team in developing a breeding  
160 strategy to achieve durable resistance to rice blast disease

161 Here we use GBS and GWAS to detect SNPs to identify loci and putative genes  
162 as markers of virulence profile. To the best of our knowledge, this is the first study to  
163 report GWAS of *M. oryzae* isolates from sub-Saharan Africa. Natural isolates of *M.*  
164 *oryzae* tend to be female sterile (Ray *et al.*, 2016) and thus, this is also the first report of  
165 GWAS of an asexually reproducing fungal pathogen.

## 166 **MATERIALS AND METHODS**

### 167 **Fungal Population used in the study**

168 The genotyped *M. oryzae* population comprise 160 isolates from nine African countries  
169 ( $n=128$ ) including Tanzania, Kenya and Uganda from East Africa, Nigeria, Burkina  
170 Faso, Benin, Togo, Mali and Ghana from West Africa, and international isolates ( $n=32$ )  
171 from seven major rice producing countries of China, India, Egypt, Philippines, South  
172 Korea, Colombia and United States (Table 1). The isolates were provided by D.  
173 Tharreau (Centre de Coopération Internationale en Recherche Agronomique pour le  
174 Développement, CIRAD, Montpellier, France), and by collaborators in the rice blast  
175 project which was supported through the Sustainable Crop Production Research for  
176 International Development (SCPRID) initiative funded by Bill & Melinda Gates  
177 Foundation through the Biotechnology and Biological Sciences Research Council  
178 (BBSRC) and Department for International Development (DFID) of the United Kingdom  
179 between 2012 and 2014.

### 180 **Fungal culture preparation, genomic DNA extraction, GBS library construction** 181 **and Pathogenicity assays**

182 Fungal isolates were grown in liquid PD broth and DNA was extracted using DNeasy  
183 Plant Mini Kit (Qiagen GmbH). GBS library construction, MiSeq sequencing and  
184 pathogenicity assays were conducted as previously described in Mutiga et al., 2017. A  
185 visual disease rating scale of 0-9 was used to assess foliar blast in pathogenicity  
186 assays.

### 187 **Rice Germplasm used in the study**



188 Sixteen rice cultivars were used in the pathotyping assays. Differential rice lines IRBLA-  
189 a, IRBLTA CP1, IRBL3-CP4, IRBL9-W, IRBLK-KA, IRBLZT-T, IRBLZ5-CA(R), IRBLTA  
190 CT2 (n=8), African Upland Rice NERICA2 and NERICA5, African lowland rice FKR62N,  
191 African intraspecific lines TS2 and F6-36, susceptible check UZROZ275, *Pi9* donor line  
192 75-1-127 and African *Oryza glaberrima* rice AR105. Nine of these cultivars had the  
193 presence of known blast resistance genes *Pia*, *Pita*, *Pi3*, *Pi9*, *Pizt*, *Piz-5*, *Pita* (Table 3).  
194 Rice cultivars containing the R-genes are known to be in the common background of an  
195 Asian *japonica* rice cultivar called Lijiangxituanheigu (LTH). The *Pi9* donor line 75-1-127  
196 was kindly provided by the Wang lab (Plant Pathology, The Ohio State University), in  
197 collaboration with Liu *et al.*, 2002. IRBLs (IRRI-bred blast-resistant lines) were provided  
198 by IRRI and bulked at DBNRRC, Stuttgart, Arkansas. UZROZ275 was provided by  
199 Correll lab (University of Arkansas). AR105, F6-36 and NERICA lines were provided by  
200 Dr. Ouédraogo (INERA-Burkina Faso, Linares 2002), NERICA lines were established by  
201 Africa Rice Center utilizing crosses of *O.glaberrima* and *O.sativa*.

## 202 **Phylogenetic and PC analysis**

203 The high-quality filtered SNP panel consisting of 617,281 SNPs was used to conduct  
204 the neighbor-joining phylogenetic cluster and principal component analyses using  
205 TASSEL v5.2.1.6 (Bradbury *et al.*, 2007). The unrooted neighbor-joining tree was  
206 constructed using the calculations derived from pairwise distance matrix between  
207 individuals/taxa. PC analysis was performed and the values of first three components  
208 were exported to R for plotting the 3D plot using P3D function (R core team 2015)

## 209 **Genome-wide association analysis**

210 Association between SNPs (GBS) and disease scores (pathogenicity assay) data was  
211 implemented using TASSEL v5.2.3 (Bradbury et al., 2007). GWA analyses were named  
212 after the cultivar of rice from which the disease scores were obtained. A Generalized  
213 Linear Model (GLM) was used to execute the association analysis utilizing the least  
214 squares fixed effects linear model. The  $p$ -values obtained from the analysis were  
215 visualized in a Q-Q plot using the R package “qqplot” (R core team., 2013).  $p$ -value  
216 cutoffs differed each analysis as they were dependent on the deviation of  $p$ -values from  
217  $X=Y$  line representing true associations.

## 218 **Identification of putative virulence-related genes**

219 A region 500bp upstream and downstream surrounding the SNPs was extracted from  
220 the respective contigs using a customized R script (R Core team., 2017). The size of the  
221 sequence determined was based on the average length of a protein sequence in NCBI  
222 db. The homology of the sequence surrounding the SNPs was identified using the DNA  
223 database from NCBI (v 2.7.1, 23 Oct, 2017).

## 224 **RESULTS**

### 225 **Geographical representation of fungal isolates from sub-Saharan Africa and the** 226 **major rice growing areas of the world**

227 The field isolates used for both pathotyping and genotyping in this study ( $n=160$ ) were  
228 collected from blast-infected rice plants from nine countries of sub-Saharan Africa,  
229 including East African countries (Kenya, Tanzania and Uganda), and West African  
230 countries (Benin, Burkina Faso, Ghana, Mali, Nigeria, and Togo, as shown in Fig. 1A. In  
231 addition, some isolates from major rice growing areas outside of SSA, such as China,

232 India, Egypt, Philippines, Colombia, South Korea and United States, were included as  
233 comparators in the analysis. SSA isolates represent the major regions as follows: those  
234 from West African countries were the highest ( $n=75$ , 46.9%) compared to East African  
235 ( $n=53$ , 33.1%) and International isolates ( $n=32$ , 20%) (Table 1). There was variable  
236 sampling within countries and Burkina Faso had the largest sampling size ( $n=36$ ,  
237 22.5%) while the least sampling size was from Ghana ( $n=2$ , 1.25%).

### 238 **GBS identifies genetic diversity among SSA field isolates**

239 Genotyping of 160 isolates of *M. oryzae* from diverse geographic regions generated a  
240 617K (617,281) panel of polymorphic markers. SNPs were then used to assess diversity  
241 of isolates using unrooted neighbor-joining trees based on a pair-wise distance matrix.  
242 The analyses showed segregation of isolates into 8 clades and 1 independent clade X.  
243 Each cluster of isolates belonged to the same country or region (Fig. 1B and C). Most of  
244 the East African countries grouped into clades 1, 4, 6, and 8 and West African countries  
245 grouped into clades 2, 3, 5, 7, and 8. Two isolates, one from Burkina Faso (BF0017)  
246 and another from Nigeria (NG0149), segregated from the rest of the major clades as an  
247 independent subclade X.

248 Isolates from the West African country of Burkina Faso clustered into 3 clades  
249 (called 2, 5 and 7) although some isolates from the East African country Tanzania were  
250 also present in these clades. Kenyan isolates segregated into 2 predominant clades (1  
251 and 6), isolates in Clade 1 clustered with 2 international isolates (from the USA and  
252 South Korea) along with a Tanzanian isolate. Seven independent Kenyan isolates  
253 clustered in Clade 4 with Tanzanian, Ugandan and 2 isolates from the United States.  
254 Clade 3 members were mostly from the West African country of Nigeria, which clustered

255 closely with isolates from other West African countries of Benin, Togo, Ghana and  
256 Burkina Faso, an isolate from East African country of Uganda and the international  
257 isolates from USA, China, Colombia and Philippines. Clade 8 had the largest number of  
258 isolates at 39, and its subclades mostly showed clustering of isolates within each  
259 country. Isolates from Tanzania were, for example, more similar to the international  
260 isolates 70-15, CHNOS-06 and BMI-24, whereas 3 isolates from Benin sub-clustered  
261 with international isolates from the USA and Egypt. Isolates from Mali and Togo were  
262 similar to the single Indian isolate IN24.

263 To explore the similarity among isolates in greater detail, we conducted Principal  
264 Component Analysis (PCA) and constructed a 3D scatter plot based on the  
265 discriminatory power of individual SNPs and used this to identify population structure  
266 patterns within West African and East African isolates, (Fig. 1C). The first three principal  
267 components (PCs) explained 23.7% of the total variance observed in the dataset. The  
268 scatter plot based on the first 3 PCs also corresponded to a close phylogenetic  
269 relationship between the isolates wherein, they segregated into 8 groups mostly based  
270 on country or region. While PC1 accounted to 10.5% of the variability, PC2 and PC3  
271 accounted for 8.3% and 4.9% of the variability respectively. The clustering of isolates  
272 observed in the unrooted neighbor joining tree was consistent with the PC analysis.

### 273 **Description of isolates chosen for GWAS analysis**

274 Representative isolates from different SSA countries were selected based on the  
275 distinct clades they occupied based on phylogenetic analysis and the availability of  
276 pathotyping data for GWAS analysis. A total of 78 isolates were used for the analysis,  
277 which accounts to 49% of the complete dataset and 80% of SSA dataset. All of the

278 isolates from the clades 6, 7, 8 and “X” were used for GWAS, whereas for clades  
279 1,2,3,4 and 5, 85%, 25%, 80%, 82.3% and 38.8% of the isolates were analyzed as  
280 shown in Table 2. International isolates were not included in the GWA analysis.

### 281 **GWAS identifies genomic markers of virulence**

282 Principal Component Analysis (PCA) has been used as an alternative to population  
283 structure analysis for studying population stratification from genotypic data (Patterson et  
284 al., 2006). In this study, we used PCA scores from the genotypes as covariates in the  
285 GWAS analyses. GWA analyses were conducted to identify genomic locations/putative  
286 genetic loci associated with the ability to cause rice blast disease in a given host  
287 cultivar. A Generalized Linear Model (GLM) was used to perform GWA using least  
288 squares fixed effects linear analysis using SNPs derived from GBS and maximum score  
289 from the disease rating observed. From the 16 GWA analyses conducted, six showed  
290 association with disease and 10 of them showed no association (Table 3). Most  $p$ -  
291 values observed in the scatter plot with association to disease were similar to the  
292 expected diagonal in the QQ-plot, demonstrating the appropriateness of the GLM Model  
293 for GWAS used in this analysis (see Fig. 2).

294 Based on the Q-Q plot analysis of each GWA analysis, independent observed –  
295  $\log P$  cutoffs were then used to obtain SNPs associated with the ability to cause disease.  
296 A cutoff of 3.5 was used in the analyses of IRBLTA, IRBL3 and NERICA5, which yielded  
297 95, 173 and 64 associated markers, respectively. A cutoff of 4.5 was used for the  
298 analyses of IRBLA-a and IRBL9-W, which yielded 135 and 54 markers, respectively,  
299 while a cutoff of 4.0 was used for IRBLK-KA which generated 7 associated markers (Fig  
300 3). A total of 528 markers were obtained from the 6 GWA analyses. However, due to the

301 absence of a completely annotated Guy11 genome, a *de novo* assembly of Guy11  
302 contigs was utilized (Source: Darren Soanes, University of Exeter) as the reference  
303 genome in the alignment process during GBS analysis. This did not provide  
304 chromosome locations and SNP positions on the genome, but did provide SNP  
305 locations in the *de novo* contigs. We then used the contig information, coupled with the  
306 SNP marker location, to identify the genomic location of markers compared to the  
307 published 70-15 *M. oryzae* genome (Dean et al., 2005).

### 308 **GWAS guides prediction of virulence-associated genetic loci**

309 A nucleotide sequence similarity search using NCBI BLASTn database (Altschul et al.,  
310 1990) was conducted with the sequences encompassing the identified SNPs, (500bp  
311 upstream and downstream based on average length of protein sequence in NCBI db;  
312 325 amino acids long) associated by GWAS with the ability to cause disease on a given  
313 host. Their homologies were categorized into four different types, which are SNP  
314 markers that are located in (a) predicted genes (PG), (b) hypothetical proteins (HP), (c)  
315 Other (OT); those present in non-coding genomic sequences, such as repeat regions,  
316 (d) no similarity (NS) (Table S1-S6).

317 The highest number of SNPs associated with blast disease were observed in the  
318 GWA analysis involving rice line IRBL3-CP4. This yielded 173 markers, out of which a  
319 majority of the markers ( $n=71$ , 41%) were predicted to be hypothetical proteins,  
320 uncharacterized ORFs whose structural genes exist but where corresponding  
321 translation products are so far unidentified. Fifty two of the markers (30%) were  
322 identified as predicted genes with known functions, and 11 genes (6.35%) reported in  
323 other uncharacterized genomic regions or repeat regions. The sequence location of 18

324 markers (10.4%) showed no similarity to any sequence present in the NCBI Nucleotide  
325 database (Fig 4).

326 The NERICA5 GWA analysis had the highest percentage of predicted gene  
327 similarity (34.9%), while the IRBLK-KA had the lowest at 14.2%. Most of the SNP  
328 markers were located in hypothetical protein-encoding genes across all the studies, with  
329 an average of 58.4% (+/-4.05) showing this association. Some markers from IRBL3-  
330 CP4, IRBLA-a, IRBLTA-CP1 and IRBL-W analyses had similarities with fosmid clone  
331 genomic regions or repeat regions and this was predominant in 3 analyses (IRBL3-CP4,  
332 IRBLA-a, IRBLTA-CP1) accounting to only 7% of the markers. In some cases, the DNA  
333 sequence in which some of the markers were present were dissimilar to sequences in  
334 the *nt* database and this accounted to 11.8% in IRBL3-CP4, 7.4% in IRBLA-a, 4.4% in  
335 IRBLTA-CP1, 12.6% in NERICA5 and 14.2% in IRBLK-KA (Fig. 4). Overall, sequence  
336 similarity to hypothetical protein-encoding genes was higher compared to predicted  
337 genes.

### 338 **Consistent SNPs associated with virulence of *M. oryzae***

339 A closer look at predicted genes across different GWA analyses indicated the  
340 recurrence of specific genes. For example, a AGC/RSK protein kinase (*MGG\_07012*), a  
341 class of protein previously implicated in regulating signaling events that coordinate  
342 growth and morphogenesis in fungi (Lee *et al.*, 2016) and a rRNA processing protein  
343 FCF2 (*MGG\_00473*) involved in ribosome biogenesis (Rempola *et al.*, 2006), were  
344 reported in five of six GWA analyses conducted (Table 4).

345 IRBLTA CP1, IRBLA-a, IRBL9-W and IRBL3 CP4 showed recurrence of 11  
346 genes. (1) Rhamnogalacturonan lyase (*MGG\_06041*) (2) Secreted glucosidase  
347 (*MGG\_10475*) (3) MFS (Major facilitator Superfamily) transporter (*MGG\_10131*), (4)  
348 Integral membrane protein (*MGG\_04629*) (5) Multidrug resistance protein fnx1  
349 (*MGG\_07444*) (6) Nitrite reductase (*MGG\_00634*) (7) Alpha/beta hydrolase  
350 (*MGG\_019030*) (8) Agglutinin Isolectin 1 (*MGG\_15185*) (9) Elongation Factor 3  
351 (*MGG\_14971*) (10) Lovastatin nonaketide synthase (*MGG\_05589*) (11) Dynamin  
352 GTPase (*MGG\_04289*) (Table 3). Three genes were identified in IRBLTA CP1 (*Pita*),  
353 IRBLA-a (*Pia*) and IRBL3-CP4 (*Pi3*), they are (1) ubiquitin C-terminal hydrolase  
354 (*MGG\_05996*) (2) Stromal membrane-associated protein 1 (*MGG\_04954*) and (3) the  
355 Developmental regulator flbA (*MGG\_14517*). DNA-repair protein rad13 (*MGG\_00155*)  
356 was reported in the three analyses of IRBLTA CP1 (*Pita*), IRBLA-a (*Pia*) and IRBL-9W  
357 (*Pi9*) (Table 4).

### 358 **Multiple SNPs in Genes/Genomic regions associated with virulence**

359 Multiple SNPs in a region/gene were observed across 5 analyses (IRBLTA CP1, IRBL3  
360 CP4, IRBLA-a, IRBLA 9-W and NERICA5). These SNPs were found to be located in  
361 hypothetical protein-encoding genes, genes with predicted products and other regions  
362 in the genome (Table 5). IRBLTA CP1 had the highest number of genes ( $n=12$ ),  
363 showing multiple SNPs, while NERICA5 had the lowest ( $n=1$ ). The IRBL3 CP4 had the  
364 second highest number ( $n=9$ ) and the analyses of IRBLA-a and IRBL9-W had similar  
365 number of genes with multiple SNPs ( $n=3$ ). SNPs varied in number from a maximum of  
366 nine to a minimum of two SNPs per region/gene. Seven genes/regions harboring  
367 multiple SNPs were commonly present in one or more of the GWA analyses.



368 *MGG\_16548* was identified in IRBLTA CP1, IRBL3 CP4, IRBL 9-W and NERICA5 while  
369 *MGG\_07814* and *MGG\_10232* were identified in IRBLTA CP1, IRBL3 CP4 and IRBL 9-  
370 W. Y34 repeat region of *M. oryzae* with accession JQ929669 was identified in IRBLTA  
371 CP1 and IRBL3 CP4, the fosmid SK2054 genomic sequence was found in IRBLTA CP1  
372 and IRBLA-a, *MGG\_02369* was identified in IRBL3 CP4 and IRBLA-a and *MGG\_17298*  
373 was present in three of the GWA analyses of IRBLTA CP1, IRBL3 CP4 and IRBLA-a.

## 374 **DISCUSSION**

375 This study utilizes SNPs derived from high-throughput genotyping using a GBS  
376 approach to characterize isolates of *M. oryzae* from Africa based on genetic diversity,  
377 and to then identify genomic regions associated with virulence on rice. While in-depth  
378 phylogenetic analysis of a sub-set of the isolates used in this study has been reported  
379 previously (Mutiga *et al.*, 2017), we report here the results of GWAS to define putative  
380 genes associated with virulence in isolates from SSA. The study involves rice lines with  
381 and without known blast resistance genes. The use of monogenic lines with known blast  
382 resistance genes was aimed at validating the known effector/avirulence genes, while  
383 the inclusion of the other lines, is expected to provide insight into the potential  
384 resistance genes and/or more insights in the pathosystem. This is the first study to  
385 identify genomic regions associated with virulence of *M. oryzae* isolates from sub-  
386 Saharan Africa based on GWAS. It is expected that these findings will boost knowledge  
387 of molecular Magnaporthe-rice pathosystem in sub-Saharan Africa, and hence enhance  
388 the breeding for durable blast resistance.

389 In this study, *M. oryzae* isolates were sampled from nine SSA countries, which  
390 were categorized into East and West Africa (Table 1). Rice cultivars commonly grown in

391 this region were utilized in the pathogenicity assays to study virulence (Table 3). Efforts  
392 were focused on a better understanding of the Magnaporthe-rice pathosystem by  
393 studying population structure of the pathogen and conducting GWAS to identify novel  
394 markers associated with pathogenicity. Previously, a robust characterization of *M.*  
395 *oryzae* isolates from SSA was conducted using a combination of phylogeny of GBS-  
396 derived SNPs and pathogenicity assays using rice differential lines harboring known  
397 blast resistance genes (Mutiga *et al.*, 2017). GBS data phylogenetics revealed genetic  
398 relatedness of the pathogen collection from different West and East African regions. A  
399 comprehensive analysis of the genetic relatedness of 78 *M. oryzae* isolates from SSA  
400 showed a clear segregation of East and West African isolates compared to isolates from  
401 outside Africa (Mutiga *et al.*, 2017). The relationship between SNPs and virulence of the  
402 isolates was studied based on disease scores using standard least square regression  
403 and an evidence of association between genetic diversity and virulence of the isolates  
404 was identified. Analysis of the association between genetic relatedness and virulence  
405 showed that 77% of isolates in the three clades with highest mean disease score were  
406 from West African region known to have had a longer history of rice cultivation  
407 compared to East Africa. The emergence of avirulent and highly virulent strains may  
408 have resulted from continued rice production, breeding diverse genotypes and trade,  
409 resulting in a continuing modification in virulence spectrum of the isolates. It was  
410 suggested that the observed differences in virulence amongst the isolates clustered  
411 within independent clades conclude that some of these SNPs can lead us to the  
412 identification of genomic regions associated with virulence or avirulence. However,  
413 since that study used relatively few isolates, in this study the sampling size was

414 increased to obtain a more holistic view of the population structure, augment the  
415 statistical power, as well as obtain meaningful associations by conducting GWAS  
416 analysis to identify novel virulence factors.

417 A GBS-SNP phylogeny of 160 isolates including 32 international isolates was  
418 conducted highlighting the clustering of isolates into eight unique clades (Fig 1).  
419 Segregation of West African and East African isolates into specific clades was clearly  
420 observed, which indicated the prevalence of higher variability and disease occurrence.  
421 Interestingly, no isolates from a single country were monophyletic, suggesting  
422 independent events of separate pathogen introductions in each country. This result is  
423 supported by the fact that *M. oryzae* is a globally dispersed trade pathogen (Tharreau *et*  
424 *al.*, 2009), and there is no clear country-specific geographic pattern of samples due to  
425 international trade and germplasm movement. Three isolates from Tanzania were, for  
426 example, closely related to most of the Burkina Faso isolates, suggesting that either of  
427 them could be the main source of disease outbreak within the region. Similarly, Burkina  
428 Faso isolates belonging to clades 2 and 5 are closely related to Kenyan isolates from  
429 clade 1 and 6. Although clade 8 was the largest-clade containing the majority of isolates  
430 ( $n=39$ ), 53.8% of those are international strains, from the U.S.A., China, Egypt and  
431 India. Moreover, 23% were from the East African country of Tanzania that were related  
432 to isolates from West African countries of Togo (7.7%), Mali (7.7%) and Ghana (7.7%).  
433 The presence of admixture of isolates such as this, is indicative of global rice trade.  
434 With the exception of one isolate from the East African country of Uganda, clade 3  
435 predominantly consists of isolates from the West African countries of Nigeria, Burkina  
436 Faso, Benin, Togo, Mali, Ghana with its origins from China, Philippines, Colombia and

437 the U.S.A. Principal Component analysis was largely consistent with the phylogenetic  
438 analysis (Fig 1B and C).

439 To our knowledge, there have been only two other reports apart from this (Mutiga  
440 *et al.*, 2017) of a fungal study using GBS for population structure and genetic diversity  
441 analysis (Milgroom *et al.*, 2014, Rafiei *et al.*, 2018). Both of those studies focused on the  
442 ascomycete fungus *Verticillium dahliae* which reproduces mitotically and the population  
443 structure of which is highly clonal. GBS was performed on 141 *V. dahliae* isolates  
444 collected from diverse geographical and host origins that yielded 26,748 SNPs. The  
445 authors identified a large number of candidate SNPs distinct to lineages that can be  
446 used in the development of diagnostic markers, providing a strong suggestion that GBS  
447 can be used as a potential genotyping method for the analysis of clonally propagating  
448 fungi (Milgroom *et al.*, 2014). The current study yielded 617,281 filtered, high-quality  
449 SNPs that constitute a substantial SNP dataset in which the SNPs are evenly  
450 distributed throughout the genome, providing a more complete assessment of  
451 population structure, which to our knowledge is the first report of such a magnitude of  
452 SNPs in such a field study. The large panel of SNP markers used in this study will  
453 provide precise discrimination among geographical regions and enhance our  
454 association analysis of the Magnaporthe-Rice pathosystem.

455 The rice cultivar panel used in this study includes a diverse panel of rice lines  
456 (Table 3) including IRRI-bred blast-resistant lines (IRBLs) with known single target *R*  
457 genes, African rice germplasm (upland, lowland and intraspecific lines), a susceptible  
458 check and *Oryza glaberrima*, the African rice species that is one parent in the  
459 interspecific NERICA lines. This diverse panel was selected ensuring adequate

460 sampling of isolates across different ecosystems that also covers screening of  
461 germplasm with known *R* genes.

462 A Generalized Linear Model was used in GWA analysis that utilizes a fixed  
463 effects linear model for association between segregating sites and phenotypes. It  
464 accounted for population structure using covariates, which indicates a degree of  
465 membership in underlying populations. Principal component (PC) scores obtained from  
466 PC analysis of genotypes were used as covariates, because there is no kinship in *M.*  
467 *oryzae* populations. Of the 16 GWA analyses, six showed association with disease in  
468 SSA, including differential rice lines that harbored the dominant *R* genes; *Pia*, *Pita*, *Pi3*,  
469 *Pi9* and *Pik* and the African interspecific upland rice variety NERICA5. Varying cutoffs  
470 for observed p-values were utilized to maximize number of markers associated with  
471 disease in each study (Fig 2). We obtained a significant number of markers ( $n=528$ )  
472 from the six studies (Fig 3), whose location on the genome was identified and NCBI  
473 BLASTn analysis confirmed the homology of sequences (500bp upstream and  
474 downstream) surrounding each SNP. The majority of those markers ( $n=269$ ) were  
475 located in genes encoding hypothetical proteins (Fig 4) with uncharacterized ORFs the  
476 structural genes of which can be predicted, but where their analogous translation  
477 products remain unidentified. It has been reported that *M. oryzae* has more than 12,000  
478 protein-encoding genes and 65% of them are not yet annotated (Li *et al.*, 2018). Thus,  
479 it is not surprising that a majority of the identified markers returned hypothetical protein  
480 hits. The second highest number of markers ( $n=161$ ) were located in genes with  
481 predicted products and it can be noted that there are several genes that were  
482 repeatedly identified across 5 of 6 GWA studies ( $n=16$ ) (Table 4). These are

483 *MGG\_07012*, *MGG\_06041*, *MGG\_10475*, *MGG\_10131*, *MGG\_07444*, *MGG\_00634*,  
484 *MGG\_01903*, *MGG\_15185*, *MGG\_05589*, *MGG\_04289*, *MGG\_00473*, *MGG\_04629*,  
485 *MGG\_14971*, *MGG\_05996*, *MGG\_04954* and *MGG\_14517*. Some of these genes have  
486 reported to be associated with disease in Magnaporthe ( $n=3$ ), other fungal systems  
487 ( $n=7$ ) and unreported ( $n=6$ ).

488 Out of the 16 genes that are considered as encoding putative virulence factors in  
489 this study, one of them, *MGG\_07012*, a AGC/RSK kinase was consistently found across  
490 5 of the 6 GWA analyses, including the African rice cultivar NERICA5, which suggests  
491 that this gene plays an important role in virulence of *M. oryzae* isolates from SSA. AGC  
492 kinases have been reported to be a common pathogenic protein kinase in fungal  
493 pathogens of humans, such as *Cryptococcus neoformans*, *Candida albicans* and  
494 *Aspergillus fumigatus* (Lee *et al.*, 2016). The AGC kinase subfamily contains 60  
495 members including RSK. In humans these kinases have been shown to mediate  
496 important cellular functions and their mutation and/or dysregulation can cause human  
497 diseases (Pearce *et al.*, 2010). Furthermore, 9 genes were repeatedly found in four  
498 analyses [IRBLTA CP1 (*Pita*), IRBLA-a (*Pia*), IRBL 9-W (*Pi9*), IRBL3-CP4 (*Pi3*)], all of  
499 which have been previously reported to be involved in virulence of *M. oryzae* or other  
500 fungal systems. The 9 respective genes identified in SSA *M. oryzae* isolates are: (1)  
501 *MGG\_06041*, a Rhamnogalactouronan lyase (Quoc and Chau, 2017) that recognizes  
502 and cleaves the  $\alpha$ - 1,4 glycosidic bonds in the backbone of rhamnogalactouronan-I, a  
503 major component of the plant cell wall polysaccharide, pectin. (2) the MFS transporter  
504 *MGG\_10131*, transporters such as these have recently been shown to be important for  
505 production of mycotoxins such as deoxynivalenol (DON) in *Fusarium graminearum*

506 (Wang *et al.*, 2018). DON plays a key role in infection of host plants (Wang *et al.*, 2018).  
507 (3) the Nitrite reductase (NR)-encoding gene *MGG\_00634*. NR catalyzes the formation  
508 of Nitric oxide (NO) which can have implications in virulence of fungal pathogens by  
509 regulation of mycotoxin biosynthesis, as reported in *Aspergillus nidulans* (Baidya *et al.*,  
510 2011). The requirement of NO for successful colonization of host by *M. oryzae* has been  
511 reported suggesting a critical role in appressorium formation (Samalova *et al.*, 2013). (4)  
512 Alpha beta-hydrolases similar to *MGG\_01903*, identified in this study, were shown to be  
513 induced during infection in *S. sclerotiorum*, where some of them are involved in lipid  
514 degradation, as esterases, or lipases, and others act as hydrolytic enzymes in general  
515 (Seifbarghi *et al.*, 2017). (5) Secreted glucosidase *MGG\_10475* was identified in four of  
516 the six GWA analyses. Glucosidases are plant cell-wall degrading enzymes shown to  
517 play a central role in fungal pathogenesis, as reported in various other fungi and  
518 oomycetes (Choi *et al.*, 2013). (6) *MGG\_07444*, a multidrug resistance protein (MDR).  
519 The MDR transporters CgTpo1\_1 and CgTpo1\_2 have been shown to play a role in  
520 virulence of *Candida glabrata* (Santos *et al.*, 2016) (7) *MGG\_15185*, Agglutinin isolectin  
521 1 was found in four of the six analyses. Lectins mediate the attachment and binding of  
522 bacteria and viruses to their hosts. Similarly, it has been reported that fungal lectins can  
523 participate in the early stages of infection in humans (Houser *et al.*, 2013). (8)  
524 *MGG\_05589*, a Lovastatin nonaketide synthase, which synthesizes Lovastatin, a  
525 polyketide metabolite in *Aspergillus terreus*. Polyketides are major fungal secondary  
526 metabolites with varied biological activities, including being implicated in pathogenicity  
527 in plants (Collemare *et al.*, 2008). (9) *MGG\_04289*, Dynamin GTPase, such as  
528 *MoDnm1* interact with partner proteins in the cytoskeleton and play important roles in



529 appressorium function and pathogenicity in *M. oryzae* (Zhong *et al.*, 2016). Interestingly,  
530 none of these nine genes was found in the GWA analysis of the African cultivar  
531 NERICA5.

532 Six other genes (Table 4) were identified in the current study that have been  
533 either indirectly implicated in pathogenicity, or have not yet been fully functionally  
534 characterized to be involved in pathogenesis. (1) *MGG\_04629*, an integral membrane  
535 protein was found across 4 of the 5 GWA analyses (2) *MGG\_14971*, an EF3 elongation  
536 factor was predicted in four of the six analyses. EF3's are necessary for growth and  
537 development of an organism and thus essential for causing disease in the pathogenic  
538 fungus *C. albicans* (Perfect, 1996) (3) *MGG\_00473*, rRNA-processing protein FCF2 has  
539 been identified in five of the six GWA analyses (4) Ubiquitin carboxyl-terminal hydrolase  
540 *MGG\_05996*, a ubiquitin pathway gene that was found in three of the six analyses (5)  
541 *MGG\_04954*, a stromal membrane associated protein was identified in 3 of 5 analyses  
542 (6) *MGG\_14517*, the developmental regulator *flbA* was found in 3 of the 5 analyses.

543 This GWA study also identified multiple SNPs in predicted genes/hypothetical  
544 proteins/loci/repeat regions. The number of SNPs ranged from a maximum of nine to a  
545 minimum of two SNPs in any gene/genomic region (Table 5). Some of these genes  
546 repeatedly occurred in multiple studies. For example, *MGG\_10232* had the presence of  
547 nine SNPs and was identified in three GWA analyses (IRBLTA CP1, IRBL3 CP4 and  
548 IRBL 9-W).

549 This study therefore demonstrates the power of using GWAS to identify markers  
550 of virulence in natural populations. This can provide insight into novel gene functions  
551 associated with rice blast disease that would otherwise not be identified based on



552 conventional experimental analysis. In this way, it may be possible to identify key  
553 pathogenicity loci, or genes associated with overcoming resistance in cultivars being  
554 grown in SSA specifically. Further work will be necessary to test the roles of the  
555 identified genes in virulence on these cultivars and then to determine how resistance is  
556 conditioned in cultivars that are not susceptible.

## 557 **ACKNOWLEDGEMENTS**

558 This project was supported, in part by the Sustainable Crop Production Research for  
559 International Development initiative, grant BB/J012157/1, funded jointly by the  
560 Biotechnology and Biological Sciences Research Council, UK, the Department for  
561 International Development and the Bill & Melinda Gates Foundation with additional  
562 funding from the Department of Biotechnology of India's Ministry of Science and  
563 Technology. We thank the technical staff from T. Mitchell, J. C. Correll, and N. Talbot for  
564 their support.

## 565 **REFERENCES**

- 566 Altschul, S.F., Gish, W., Miller, W., Myers, E.W. & Lipman, D.J. (1990) "Basic local  
567 alignment search tool." *J. Mol. Biol.* 215:403-410.
- 568 Baidya, S., Cary, J. W., Grayburn, W. S., Calvo A. M. (2011) Role of nitric oxide and  
569 flavohemoglobin homolog genes in *Aspergillus nidulans* sexual development  
570 and mycotoxin production. *Appl. Environ. Microbiol.* 77 5524–5528.  
571 10.1128/AEM.00638-11.
- 572 Balasubramanian, V., Sie, M., Hijmans, R. J., & Otsuka, K. (2007) Increasing Rice  
573 Production in Sub-Saharan Africa: Challenges and Opportunities. *Advances in*  
574 *Agronomy*; Vol. 94, pp. 55-133 DOI: 10.1016/S0065-2113(06)94002-4.

- 575 Bartoli, C, Roux, F. (2017) Genome-wide association studies in plant pathosystems:  
576 toward an ecological genomics approach. *Front Plant Sci.* 8:763.
- 577 Bradbury, P. J., Zhang, Z., Kroon, D. E., Casstevens, T. M., Ramdoss, Y., and  
578 Buckler, E. S. (2007) TASSEL: software for association mapping of complex  
579 traits in diverse samples. *Bioinformatics* 23, 2633–2635. doi:  
580 10.1093/bioinformatics/btm308
- 581 Burdon, J.J., Thrall, P.H. (2009) Coevolution of plants and their pathogens in natural  
582 habitats. *Science.* 324:755–756.
- 583 Choi, J., Kim, K-T., Jeon, J. and Lee, Y-H. (2013) Fungal plant cell wall-degrading  
584 enzymedatabase: a platform for comparative andevolutionary genomics in fungi  
585 and Oomycetes. *BMC Genomics*; 14 (Suppl 5):S7.
- 586 Collemare, J., Billard, A., Böhnert, H.U., Lebrun, M.H. (2008) Biosynthesis of  
587 secondary metabolites in the rice blast fungus *Magnaporthe grisea*: the role of  
588 hybrid PKS-NRPS in pathogenicity. *Mycol Res* 112: 207–215.
- 589 Dalman, K., Himmelstrand, K., Olson, A., Lind, M., Brandstrom-Durling, M., Stenlid, J.  
590 (2013) A genome-wide association study identifies genomic regions for  
591 virulence in the non-model organism *Heterobasidion annosum* s.s. *PLoS*  
592 *ONE* 8:e53525. 10.1371/journal.pone.0053525.
- 593 Dean R.A. Talbot N.J. et al. . (2005) The genome sequence of the rice blast fungus  
594 *Magnaporthe grisea*. *Nature* 434: 980–986.
- 595 Dodds P.N., Rafiqi M, Gan P.H.P, Hardham A.R, Jones D.A, Ellis J.G. (2009) Effectors  
596 of biotrophic fungi and oomycetes - pathogenicity factors and triggers of host  
597 resistance. *New Phytology*; 183:993–1000.
- 598 Dodds, P.N., and Rathjen, J.P. (2010) Plant immunity: towards an integrated view of  
599 plant–pathogen interactions. *Nat Rev Genet* 11: 539–548.
- 600 Elshire, R.J., Glaubitz, J.C., Sun, Q., Poland, J.A., Kawamoto, K., et al. (2011) A  
601 Robust, Simple Genotyping-by-Sequencing (GBS) Approach for High Diversity  
602 Species. *PLoS One* 6: e19379.

- 603 Fernández-Mazuecos, M., Mellers, G., Vigalondo, B., Sáez, L., Vargas, P., Glover, B.  
604 J. (2018) Resolving Recent Plant Radiations: Power and Robustness of  
605 Genotyping-by-Sequencing, *Systematic Biology*, Volume 67, Issue 2, Pages  
606 250–268.
- 607 Gao, Y., Liu, Z., Faris, J. D., Richards, J., Brueggeman, R. S., Li X., et al. .  
608 (2016) Validation of genome-wide association studies as a tool to identify  
609 virulence factors in *Parastagonospora nodorum*. *Phytopathology* 106, 1177–  
610 1185. 10.1094/PHYTO-02-16-0113-FI.
- 611 Gibriel, H.A., Thomma, B.P. and Seidl, M.F. (2016) The age of effectors:  
612 genome-based discovery and applications. *Phytopathology*, 106, 1206–1212.
- 613 Glaubitz J.C., Casstevens T.M., Lu, F., Harriman, J., Elshire, R.J., Sun, Q., et al.  
614 (2014) TASSEL-GBS: A High Capacity Genotyping by Sequencing Analysis  
615 Pipeline. *PLoS ONE* 9(2): e90346.
- 616 Guttman, D. S., McHardy, A. C., Schulze-Lefert, P. (2014) Microbial genome-enabled  
617 insights into plant-microorganism interactions. *Nat. Rev. Genet.* 15, 797–813.  
618 10.1038/nrg3748.
- 619 Hartmann, F. E., Sanchez-Vallet, A., McDonald, B., Croll, D. (2017) A fungal wheat  
620 pathogen evolved host specialization by extensive chromosomal  
621 rearrangements. *ISME J.* 11, 1189–1204. 10.1038/ismej.2016.196.
- 622 Houser, J., Komarek, J., Kostlanova, N., Cioci, G., Varrot, A., Kerr, S.C., Lahmann, M.,  
623 Balloy, V., Fahy, J.V., Chignard, M., et al. (2013) A soluble fucose-specific lectin  
624 from *Aspergillus fumigatus* conidia--structure, specificity and possible role in  
625 fungal pathogenicity. *PLoS One.* 8:e83077.
- 626 Hussain, W., Baenziger, P.S., Belamkar, V., Guttieri, M.J., Venegas, J.P., Easterly, A.,  
627 Sallam, A., and Poland, J. (2017) Genotyping-by-Sequencing Derived High-  
628 Density Linkage Map and its Application to QTL Mapping of Flag Leaf Traits in  
629 Bread Wheat. *Scientific Reports* volume 7, Article number: 16394.
- 630 Jones, J. D., and Dangl, J. L. (2006) The plant immune system. *Nature* 444, 323–329.

- 631 Kamoun, S. (2007) Groovy times: Filamentous pathogen effectors revealed. *Curr.*  
632 *Opin. Plant Biol.* 10: 358–365.
- 633 Leboldus J. M., Kinzer K., Richards J., Ya Z., Yan C., Friesen T. L., et al.  
634 (2015) Genotype-by-sequencing of the plant-pathogenic fungi *Pyrenophora*  
635 *teres* and *Sphaerulina musiva* utilizing Ion Torrent sequence technology. *Mol.*  
636 *Plant Pathol.* 16 623–632. 10.1111/mpp.12214.
- 637 Lee, K.-T., So, Y.-S., Yang, D.-H., Jung, K.-W., Choi, J., Lee, D.-G., et al. (2016)  
638 Systematic functional analysis of kinases in the fungal pathogen *Cryptococcus*  
639 *neoformans*. *Nature Communications*, 7, 12766.  
640 <http://doi.org/10.1038/ncomms12766>.
- 641 Li, G., Huang, J., Yang, J., He, D., Wang, C., Qi, X., Taylor, I. A., Liu, J., and Peng, Y-  
642 L. (2017) Structure based function-annotation of hypothetical protein  
643 MGG\_01005 from *Magnaporthe oryzae* reveals it is the dynein light chain  
644 orthologue of dynlt1/3. *Scientific Reports* volume 8, Article number: 3952.
- 645 Mgonja, E.M., Park, C.H., Kang, H, Balimponya, E.G., Opiyo, S.O., Bellizzi, M, Mutiga,  
646 S.K, Rotich, F., Devi Ganeshan, V., Mabagala, R., Sneller, C, Correll, J.C.,  
647 Zhou, B., Talbot, N.J., Mitchell, T.K., and Wang, G-L. (2017) Genotyping-By-  
648 Sequencing-Based Genetic Analysis of African Rice Cultivars and Association  
649 Mapping of Blast Resistance Genes Against *Magnaporthe oryzae* Populations  
650 in Africa. *Phytopathology*. 107: 1039-1046. doi: 10.1094/PHYTO-12-16-0421-R.
- 651 Milgroom, M.G, Jiménez-Gasco, M.M, Olivares-García, C., Drott, M.T., Jiménez-Díaz,  
652 R.M. (2014) Recombination between clonal lineages of the asexual fungus  
653 *Verticillium dahliae* detected by genotyping by sequencing. *PLoS ONE* 9,  
654 e106740.
- 655 Monteil, C. L., Yahara, K., Studholme, D. J., Mageiros, L., Méric, G., Swingle, B., et al.  
656 (2016) Population-genomic insights into emergence, crop adaptation and  
657 dissemination of *Pseudomonas syringae* pathogens. *Microbial*  
658 *Genomics*, 2(10), e000089. <http://doi.org/10.1099/mgen.0.000089>.

- 659 Mutiga, S. K., Rotich, F., Devi Ganeshan, V., Mwongera, D. T., Mgonja, E. M., Were,  
660 V. M., Harvey, J. W., Zhou, B., Wasilwa, L., Feng, C., Ouédraogo, I., Wang, G.-  
661 L., Mitchell, T. K., Talbot, N. J., and Correll, J. C. (2017) Assessment of the  
662 Virulence Spectrum and Its Association with Genetic Diversity in *Magnaporthe*  
663 *oryzae* Populations from Sub-Saharan Africa. *Phytopathology* 107:7, 852-863.
- 664 Nalley, L., Tsiboe, F., Durand-Morat, A., Shew, A., Thoma, G. (2016) Economic and  
665 Environmental Impact of Rice Blast Pathogen (*Magnaporthe oryzae*) Alleviation  
666 in the United States. *PLOS ONE* 11(12):  
667 e0167295. <https://doi.org/10.1371/journal.pone.0167295>.
- 668 Nigatu, G., Hansen, J., Childs, N., and Seeley, R. (2017) Sub-Saharan Africa Is  
669 Projected To Be the Leader in Global Rice Imports. *Amber Waves*.
- 670 Norelli, J. L., Wisniewski, M., Fazio, G., Burchard, E., Gutierrez, B., Levin, E., and  
671 Droby, S. (2017) Genotyping-by-sequencing markers facilitate the identification  
672 of quantitative trait loci controlling resistance to *Penicillium expansum* in *Malus*  
673 *sieversii*. *PLoS ONE*, 12(3), e0172949.  
674 <http://doi.org/10.1371/journal.pone.0172949>.
- 675 Occhipinti, A. (2013) Plant coevolution: evidences and new challenges. *J Plant Interact*  
676 8: 188–196.
- 677 Patterson., N, Price., AL, Reich., D. (2006) Population Structure and Eigenanalysis.  
678 *PLoS Genet* 2(12): e190.
- 679 Pearce, L. R., Komander, D. and Alessi, D. R. (2010) The nuts and bolts of AGC  
680 protein kinases. *Nat. Rev. Mol. Cell Biol.* 11, 9–22.
- 681 Perfect, J.R. (1996) Fungal virulence genes as targets for antifungal chemotherapy.  
682 *Antimicrob. Agents Chemother.* 40, 1577 1583.
- 683 Petit-Houdenot, Y. and Fudal, I. (2017) Complex interactions between fungal  
684 avirulence genes and their corresponding plant resistance genes and  
685 consequences for disease resistance management. *Front. Plant Sci.* 8, 1072.  
686 doi: 10.3389/ fpls.2017.01072.

- 687 Pilet-Nayel, M-L., Moury, B., Caffier, V., Montarry, J., Kerlan, M-C., Fournet, S., Durel,  
688 C-E., Delourme, R. (2017) Quantitative resistance to pathogens in plant  
689 pyramiding strategies for durable crop protection. *Front. Plant Sci.* 8:1838.
- 690 Plissonneau, C., Blaise, F., Ollivier, B., Leflon, M., Carpezat, J., Rouxel, T., et al.  
691 (2017) Unusual evolutionary mechanisms to escape effector-triggered-immunity  
692 in the fungal phytopathogen *Leptosphaeria maculans*. *Mol. Ecol.* 26, 2183–  
693 2198. 10.1111/mec.14046.
- 694 Quoc, N. B. and Chau, N. N. B. (2017) The role of cell wall degrading enzymes in  
695 Pathogenesis of *Magnaporthe oryzae*. *Current Protein and Peptide Science*, 18,  
696 1-16.
- 697 R Core Team (2017) R: A language and environment for statistical computing. *Vienna,*  
698 *Austria: R Foundation for statistical computing 2016*; 860-864.
- 699 Rafiei, V., Banihashemi, Z., Jiménez-Díaz, R. M., Navas-Cortés, J. A., Landa, B. B.,  
700 Jiménez-Gasco, M. M., Turgeon, B. G., Milgroom, M. G. (2017) Comparison of  
701 genotyping by sequencing and microsatellite markers for unravelling population  
702 structure in the clonal fungus *Verticillium dahlia*. *Plant Pathology* 67, 76–86.
- 703 Ray,S., Singh, P. K., Gupta, D. K., Mahato, A. K., Sarkar, C., Rathour, R., Singh, N.  
704 K., Sharma, T. R. (2016) Analysis of *Magnaporthe oryzae* genome reveals a  
705 fungal effector, which is able to induce resistance response in transgenic rice  
706 line containing resistance gene, *pi54*. *Frontiers in Plant Science*, 7, p. 1140.
- 707 Rempola, B., Karkusiewicz, I., Piekarska, I., Rytka, J. (2006) Fcf1p and Fcf2p are  
708 novel nucleolar *Saccharomyces cerevisiae* proteins involved in pre-rRNA  
709 processing. *Biochem. Biophys. Res. Commun.*; 346:546–554.
- 710 Saito, K., Nelson, A., Zwart, S. J., Niang, A., Sow, A., Yoshida, H., and Wopereis, M.  
711 C. S. (2013) Towards a Better Understanding of biophysical determinants of  
712 yield gaps and the potential for expansion of the rice area in Africa. *Realizing*  
713 *Africa's Rice Promise*. M. C. S. Pages 188-203.

- 714 Samalova, M., Johnson, J., Illes, M., Kelly, S., Fricker, M., and Gurr, S. (2013) Nitric  
715 oxide generated by the rice blast fungus *Magnaporthe oryzae* drives plant  
716 infection. *New Phytol.* 197, 207–222. doi: 10.1111/j.1469-8137.2012.04368.x
- 717 Sanchez-Vallet, A., Hartmann, F.E., Marcel T. C., and Croll, D. (2018) Nature's genetic  
718 screens: using genome-wide association studies for effector discovery.  
719 *Molecular Plant Pathology*, 19 (1): 3-6, Oxford: Wiley-Blackwell, 2018.
- 720 Santos R., Costa C., Mil-Homens D., Romão D., de Carvalho C. C. C. R., Pais P., et  
721 al. (2017) The multidrug resistance transporters CgTpo1\_1 and CgTpo1\_2 play  
722 a role in virulence and biofilm formation in the human pathogen *Candida*  
723 *glabrata*. *Cell. Microbiol.* 19, 1–13. 10.1111/cmi.12686.
- 724 Seifbarghi, S., Borhan, M.H., Wei, Y., Coutu, C., Robinson, S.J., and Hegedus, D.D.  
725 (2017) Changes in the *Sclerotinia sclerotiorum* transcriptome during infection of  
726 *Brassica napus*. *BMC Genomics*. Mar 29; 18 (1):266.
- 727 Sharma, T. R., Rai, A. K., Gupta, S. K., Vijayan, J., Devanna, B. N., Ray, S.  
728 (2012). Rice blast management through host-plant resistance: retrospect and  
729 prospects. *Agri. Res.* 1, 37–52. 10.1007/s40003-011-0003-5.
- 730 Talas, F., Kalih, R., Miedaner, T., McDonald, B. A. (2016) Genome-wide association  
731 study identifies novel candidate genes for aggressiveness, deoxynivalenol  
732 production, and azole sensitivity in natural field populations of *Fusarium*  
733 *graminearum*. *Mol. Plant Microbe Interact.* 29, 417–430.
- 734 Tharreau, D., Fudal, I., Andriantsimalona, D., Santoso, Utami, D., Fournier, E.,  
735 Lebrun, M.H., Nottéghem, J.L. (2009) World population structure and migration  
736 of the rice blast fungus, *Magnaporthe oryzae*. *Advances in genetics, genomics*  
737 *and control of rice blast disease*. Wang GL, Valent B, eds. Dordrecht, the  
738 Netherlands: Springer, 209–215.
- 739 Torkamaneh, D., Laroche, J., Bastien, M., Abed, A. and Belzile, F. (2017a) Fast-GBS:  
740 a new pipeline for the efficient and highly accurate calling of SNPs from  
741 genotyping-by-sequencing data. *BMC Bioinformatics*, 18, 5.



- 742 Wang, Q., Chen, D., Wu, M., Zhu, J., Jiang, C., Xu, J-R and Liu, H. (2018) MFS  
 743 Transporters and GABA Metabolism Are Involved in the Self-Defense Against  
 744 DON in *Fusarium graminearum*. *Front. Plant Sci.*, 13 April 2018.
- 745 Wu, J.Q., Sakthikumar, S., Dong, C., Zhang, P., Cuomo, C.A. and Park, R.F. (2017)  
 746 Comparative genomics integrated with association analysis identifies candidate  
 747 effector genes corresponding to Lr20 in phenotype-paired *Puccinia triticina*  
 748 isolates from Australia. *Front. Plant Sci.* 8, 148.
- 749 Wu, Y., Xiao, N., Yu, L., Pan, C., Li, Y., Zhang, X., et al. (2015) Combination patterns  
 750 of major *R* genes determine the level of resistance to the *M. oryzae* in rice  
 751 (*Oryza sativa* L.). *PLoS ONE* 10:e0126130. [10.1371/journal.pone.0126130](https://doi.org/10.1371/journal.pone.0126130).
- 752 Zhong, K., Li, X., Le, X., Kong, X., Zhang, H., Zheng, X., Wang, P. and Zhang, Z.  
 753 (2016) *MoDnm1* Dynamin Mediating Peroxisomal and Mitochondrial Fission in  
 754 Complex with MoFis1 and MoMdv1 Is Important for Development of Functional  
 755 Appressorium in *Magnaporthe oryzae*. *PLoS Pathog* 12(8): e1005823.  
 756 <https://doi.org/10.1371/journal.ppat.1005823>.

757 **TABLES**

758 **Table 1:** Country origins and collection sites of *M. oryzae* isolates from different parts of  
 759 rice growing SSA countries and International regions (n=160). Y indicates the presence  
 760 of the isolate in a clade and the asterisk represents isolates randomly chosen for GWAS  
 761 (n=78).

| Region/Country     | No. | Isolate | Collection Site | Year | Clade 1 | Clade 2 | Clade 3 | Clade 4 | Clade 5 | Clade 6 | Clade 7 | Clade 8 | Sub-clade X | Total No. |
|--------------------|-----|---------|-----------------|------|---------|---------|---------|---------|---------|---------|---------|---------|-------------|-----------|
| No. of isolates    |     |         |                 |      | 13      | 17      | 37      | 18      | 16      | 13      | 5       | 39      | 2           |           |
| <b>East Africa</b> |     |         |                 |      |         |         |         |         |         |         |         |         |             | 53        |
| KENYA              | 1   | KE0001  | Mwea            | 2013 |         |         |         | Y       |         |         |         |         |             | 28        |
|                    | 2   | KE0003  | Mwea            | 2013 |         |         |         |         |         | Y       |         |         |             |           |
|                    | 3   | KE0005  | Mwea            | 2013 |         |         |         |         |         | Y*      |         |         |             |           |
|                    | 4   | KE0006  | Mwea            | 2013 |         |         |         |         |         | Y*      |         |         |             |           |
|                    | 5   | KE0007  | Mwea            | 2013 | Y       |         |         |         |         |         |         |         |             |           |
|                    | 6   | KE0008  | Mwea            | 2013 | Y       |         |         |         |         |         |         |         |             |           |
|                    | 7   | KE0009  | Mwea            | 2013 | Y       |         |         |         |         |         |         |         |             |           |



|          |    |        |                  |      |    |    |    |    |    |
|----------|----|--------|------------------|------|----|----|----|----|----|
|          | 8  | KE0010 | Mwea             | 2013 |    | Y  |    |    |    |
|          | 9  | KE0015 | Mwea             | 2013 |    |    |    | Y* |    |
|          | 10 | KE0016 | Mwea             | 2013 |    |    |    | Y  |    |
|          | 11 | KE0017 | Mwea             | 2013 |    |    |    | Y  |    |
|          | 12 | KE0019 | Mwea             | 2013 | Y* |    |    |    |    |
|          | 13 | KE0020 | Mwea             | 2013 | Y  |    |    |    |    |
|          | 14 | KE0022 | Mwea             | 2013 | Y  |    |    |    |    |
|          | 15 | KE0023 | Mwea             | 2013 |    | Y  |    |    |    |
|          | 16 | KE0024 | Mwea             | 2013 |    |    |    | Y  |    |
|          | 17 | KE0027 | Mwea             | 2013 |    |    |    | Y  |    |
|          | 18 | KE0029 | Mwea             | 2013 |    |    |    | Y  |    |
|          | 19 | KE0030 | Mwea             | 2013 |    |    |    | Y* |    |
|          | 20 | KE0032 | Mwea             | 2013 |    |    |    | Y  |    |
|          | 21 | KE0033 | Mwea             | 2013 | Y  |    |    |    |    |
|          | 22 | KE0035 | Mwea             | 2013 | Y  |    |    |    |    |
|          | 23 | KE0036 | Mwea             | 2013 | Y  |    |    |    |    |
|          | 24 | KE0037 | Mwea             | 2013 |    | Y  |    |    |    |
|          | 25 | KE0040 | Mwea             | 2013 | Y  |    |    |    |    |
|          | 26 | KE0041 | Mwea             | 2013 |    | Y* |    |    |    |
|          | 27 | KE0210 | Ahero            | 2014 |    | Y* |    |    |    |
|          | 28 | KE0215 | Mwea             | 2013 |    | Y* |    |    |    |
| TANZANIA | 1  | TN0001 | Kyela            | 2013 |    |    |    | Y* | 20 |
|          | 2  | TN0004 | Morogoro<br>SUA- | 2013 |    | Y  |    |    |    |
|          | 3  | TN0005 | UA               | 2013 |    |    | Y* |    |    |
|          | 4  | TN0006 | Morogoro<br>SUA- | 2013 |    |    | Y  |    |    |
|          | 5  | TN0007 | Morogoro<br>SUA- | 2013 | Y  |    |    |    |    |
|          | 6  | TN0008 | Morogoro         | 2013 | Y* |    |    |    |    |
|          | 7  | TN0010 | Kahama           | 2013 |    | Y* |    |    |    |
|          | 8  | TN0014 | Kyela            | 2013 |    |    |    | Y* |    |
|          | 9  | TN0016 | Kyela            | 2013 |    |    |    | Y* |    |
|          | 10 | TN0019 | Kyela            | 2013 |    |    |    | Y* |    |
|          | 11 | TN0045 | Ifakara          | 2013 |    | Y* |    |    |    |
|          | 12 | TN0050 | Ifakara          | 2013 |    | Y* |    |    |    |
|          | 13 | TN0057 | Ifakara          | 2013 |    | Y* |    |    |    |
|          | 14 | TN0065 | Ifakara          | 2013 |    |    |    | Y* |    |
|          | 15 | TN0068 | Ifakara          | 2013 |    |    |    | Y* |    |
|          | 16 | TN0070 | Ifakara          | 2013 |    | Y* |    |    |    |
|          | 17 | TN0077 | Ifakara          | 2013 |    |    |    | Y* |    |
|          | 18 | TN0078 | Ifakara          | 2013 |    | Y* |    |    |    |
|          | 19 | TN0079 | Ifakara          | 2013 |    |    |    | Y* |    |
|          | 20 | TN0098 | Ifakara          | 2013 |    |    |    | Y* |    |
| UGANDA   | 1  | UG0001 | Butaleja         | 2013 |    | Y* |    |    | 5  |
|          | 2  | UG0006 | Bulega           | 2013 |    |    |    | Y* |    |
|          | 3  | UG0008 | Namulonge        | 2013 | Y* |    |    |    |    |

| <i>Region/Country</i> | <i>Isolate(s)</i> | <i>Collection Site</i> | <i>Year</i>       | <i>Clade 1</i> | <i>Clade 2</i> | <i>Clade 3</i> | <i>Clade 4</i> | <i>Clade 5</i> | <i>Clade 6</i> | <i>Clade 7</i> | <i>Clade 8</i> | <i>Sub-clade X</i> | <i>Total No.</i> |
|-----------------------|-------------------|------------------------|-------------------|----------------|----------------|----------------|----------------|----------------|----------------|----------------|----------------|--------------------|------------------|
|                       | 4                 | UG0009                 | Butaleja          | 2013           |                |                |                |                | Y*             |                |                |                    |                  |
|                       | 5                 | UG0011                 | Namulonge         | 2013           |                |                |                |                |                | Y              |                |                    |                  |
| <i>West Africa</i>    |                   |                        |                   |                |                |                |                |                |                |                |                |                    | 75               |
| NIGERIA               | 1                 | NG0026                 | Ibadan            | 2009           |                |                |                |                |                |                |                |                    | 17               |
|                       | 2                 | NG0095                 | Ibadan            | 2009           |                |                |                |                |                |                |                |                    |                  |
|                       | 3                 | NG0103                 | Ibadan            | 2010           |                |                |                |                |                |                |                |                    |                  |
|                       | 4                 | NG0104                 | Ibadan            | 2010           |                |                |                |                |                |                |                |                    |                  |
|                       | 5                 | NG0110                 | Ibadan            | 2010           |                |                |                |                |                |                |                |                    |                  |
|                       | 6                 | NG0133                 | Ibadan            | 2009           |                |                |                |                |                |                |                |                    |                  |
|                       | 7                 | NG0134                 | Ibadan            | 2009           |                |                |                |                |                |                |                |                    |                  |
|                       | 8                 | NG0135                 | Ibadan            | 2009           |                |                |                |                |                |                |                |                    |                  |
|                       | 9                 | NG0149                 | Ibadan            | 2009           |                |                |                |                |                |                |                | Y                  |                  |
|                       | 10                | NG0159                 | Ibadan            | 2009           |                |                |                |                |                |                |                |                    |                  |
|                       | 11                | NG0176                 | Ibadan            | 2009           |                |                |                |                |                |                |                |                    |                  |
|                       | 12                | NG0179                 | Ibadan            | 2009           |                |                |                |                |                |                |                |                    |                  |
|                       | 13                | NG0190                 | Ibadan            | 2009           |                |                |                |                |                |                |                |                    |                  |
|                       | 14                | NG0192                 | Ibadan            | 2009           |                |                |                |                |                |                |                |                    |                  |
|                       | 15                | NG0199                 | Ibadan            | 2009           |                |                |                |                |                |                |                |                    |                  |
|                       | 16                | NG0245                 | Abéocuta          | 2009           |                |                |                |                |                |                |                |                    |                  |
|                       | 17                | NG0253                 | Edozhigi          | 2009           |                |                |                |                |                |                |                |                    |                  |
| BURKINA FASO          | 1                 | BF0001                 | Loto              | 2013           |                |                |                |                | Y*             |                |                |                    | 36               |
|                       | 2                 | BF0002                 | Loto              | 2013           |                |                |                |                | Y*             |                |                |                    |                  |
|                       | 3                 | BF0003                 | Loto              | 2013           |                | Y*             |                |                |                |                |                |                    |                  |
|                       | 4                 | BF0004                 | Loto              | 2013           |                | Y*             |                |                |                |                |                |                    |                  |
|                       | 5                 | BF0005                 | Sinkoura          | 2013           |                |                |                |                |                | Y*             |                |                    |                  |
|                       | 6                 | BF0006                 | Sinkoura          | 2013           |                |                |                |                |                | Y*             |                |                    |                  |
|                       | 7                 | BF0007                 | Sinkoura          | 2013           |                |                |                |                |                | Y*             |                |                    |                  |
|                       | 8                 | BF0008                 | Niéna<br>Dionkéle | 2013           |                |                |                |                | Y              |                |                |                    |                  |
|                       | 9                 | BF0009                 | Niéna<br>Dionkéle | 2013           |                |                |                |                | Y*             |                |                |                    |                  |
|                       | 10                | BF0010                 | Niéna<br>Dionkéle | 2013           |                |                |                |                | Y              |                |                |                    |                  |
|                       | 11                | BF0012                 | Niéna<br>Dionkéle | 2013           |                |                |                |                | Y              |                |                |                    |                  |
|                       | 12                | BF0013                 | Niéna<br>Dionkéle | 2013           |                | Y              |                |                |                |                |                |                    |                  |
|                       | 13                | BF0014                 | Niéna<br>Dionkéle | 2013           |                |                |                |                | Y              |                |                |                    |                  |
|                       | 14                | BF0015                 | Niéna<br>Dionkéle | 2013           |                | Y              |                |                |                |                |                |                    |                  |
|                       | 15                | BF0016                 | Niéna<br>Dionkéle | 2013           |                | Y              |                |                |                |                |                |                    |                  |
|                       | 16                | BF0017                 | Niéna<br>Dionkéle | 2013           |                |                |                |                |                |                |                | Y*                 |                  |
|                       | 17                | BF0019                 | Niéna<br>Dionkéle | 2013           |                | Y              |                |                |                |                |                |                    |                  |
|                       | 18                | BF0020                 | Niéna<br>Dionkéle | 2013           |                | Y*             |                |                |                |                |                |                    |                  |
|                       | 19                | BF0021                 | Banfora           | 2013           |                | Y*             |                |                |                |                |                |                    |                  |
|                       | 20                | BF0023                 | Banfora           | 2013           |                |                |                |                | Y              |                |                |                    |                  |

|                       |    |                   |                         |             |                |                |                |                |                |                |                |                |                    |                  |    |           |
|-----------------------|----|-------------------|-------------------------|-------------|----------------|----------------|----------------|----------------|----------------|----------------|----------------|----------------|--------------------|------------------|----|-----------|
|                       | 21 | BF0024            | Banfora                 | 2013        |                |                |                |                |                |                |                |                |                    |                  | Y  |           |
|                       | 22 | BF0027            | Banfora                 | 2013        |                |                | Y              |                |                |                |                |                |                    |                  |    |           |
|                       | 23 | BF0029            | Banfora                 | 2013        |                |                |                |                |                |                |                |                |                    |                  | Y  |           |
|                       | 24 | BF0031            | Banfora                 | 2013        |                | Y              |                |                |                |                |                |                |                    |                  |    |           |
|                       | 25 | BF0032            | Banfora                 | 2013        |                | Y*             |                |                |                |                |                |                |                    |                  |    |           |
|                       | 26 | BF0035            | Banfora                 | 2013        |                |                |                |                |                |                |                |                |                    |                  | Y* |           |
|                       | 27 | BF0036            | Banfora                 | 2013        |                |                |                |                |                |                |                |                |                    |                  | Y  |           |
|                       | 28 | BF0037            | Banfora                 | 2013        |                |                |                |                |                |                |                |                |                    |                  | Y  |           |
|                       | 29 | BF0038            | Banfora                 | 2013        |                | Y              |                |                |                |                |                |                |                    |                  |    |           |
|                       | 30 | BF0040            | Banfora                 | 2013        |                |                |                |                |                |                |                |                |                    |                  | Y  |           |
|                       | 31 | BF0041            | Banfora                 | 2013        |                | Y              |                |                |                |                |                |                |                    |                  |    |           |
|                       | 32 | BF0046            | Banfora                 | 2013        |                | Y*             |                |                |                |                |                |                |                    |                  |    |           |
|                       | 33 | BF0047            | Banfora                 | 2013        |                | Y              |                |                |                |                |                |                |                    |                  |    |           |
|                       | 34 | BF0048            | Banfora                 | 2013        |                | Y*             |                |                |                |                |                |                |                    |                  |    |           |
|                       | 35 | BF0049            | Pankatiro               | 2013        |                |                |                |                |                |                |                |                |                    |                  | Y* |           |
|                       | 36 | BF0050            | Pankatiro               | 2013        |                |                |                |                |                |                |                |                |                    |                  | Y  |           |
| BENIN                 | 1  | BN0013            | Malanville              | 2011        |                |                | Y*             |                |                |                |                |                |                    |                  |    | 10        |
|                       | 2  | BN0036            | Bétérou                 | 2012        |                |                | Y*             |                |                |                |                |                |                    |                  |    |           |
|                       | 3  | BN0040            | Bétérou                 | 2012        |                |                | Y*             |                |                |                |                |                |                    |                  |    |           |
|                       | 4  | BN0066            | Kerou<br>Kokey-         | 2012        |                |                | Y*             |                |                |                |                |                |                    |                  |    |           |
|                       | 5  | BN0125            | Banikoara               | 2012        |                |                | Y*             |                |                |                |                |                |                    |                  |    |           |
|                       | 6  | BN0139            | Natitingou              | 2012        |                |                | Y*             |                |                |                |                |                |                    |                  |    |           |
|                       | 7  | BN0152            | Savalou                 | 2012        |                |                |                |                |                |                |                |                |                    |                  | Y* |           |
|                       | 8  | BN0157            | Savalou                 | 2012        |                |                |                |                |                |                |                |                |                    |                  | Y* |           |
|                       | 9  | BN0170            | Kerou                   | 2012        |                |                | Y*             |                |                |                |                |                |                    |                  |    |           |
|                       | 10 | BN0202            | Lokossa                 | 2010        |                |                |                |                |                |                |                |                |                    |                  | Y* |           |
| <b>Region/Country</b> |    | <b>Isolate(s)</b> | <b>Collection Site</b>  | <b>Year</b> | <b>Clade 1</b> | <b>Clade 2</b> | <b>Clade 3</b> | <b>Clade 4</b> | <b>Clade 5</b> | <b>Clade 6</b> | <b>Clade 7</b> | <b>Clade 8</b> | <b>Sub-clade X</b> | <b>Total No.</b> |    |           |
| <b>West Africa</b>    |    |                   |                         |             |                |                |                |                |                |                |                |                |                    |                  |    | <b>75</b> |
| TOGO                  | 1  | TG0003            | Assomè                  | 2012        |                |                | Y*             |                |                |                |                |                |                    |                  |    | 7         |
|                       | 2  | TG0004            | Elavayo                 | 2012        |                |                |                |                |                |                |                |                | Y*                 |                  |    |           |
|                       | 3  | TG0005            | Assomè                  | 2012        |                |                | Y*             |                |                |                |                |                |                    |                  |    |           |
|                       | 4  | TG0008            | Elavayo                 | 2012        |                |                |                |                |                |                |                |                | Y*                 |                  |    |           |
|                       | 5  | TG0011            | Elavayo                 | 2012        |                |                |                |                |                |                |                |                | Y*                 |                  |    |           |
|                       | 6  | TG0016            | Assomè                  | 2012        |                |                | Y*             |                |                |                |                |                |                    |                  |    |           |
|                       | 7  | TG0035            | Assomè                  | 2012        |                |                | Y*             |                |                |                |                |                |                    |                  |    |           |
| MALI                  | 1  | ML0060            | Sikasso                 | 2009        |                |                |                |                |                |                |                |                | Y*                 |                  |    | 3         |
|                       | 2  | ML0062            | Sikasso                 | 2009        |                |                |                |                |                |                |                |                | Y*                 |                  |    |           |
|                       | 3  | ML0066            | Sikasso                 | 2011        |                |                |                |                |                |                |                |                | Y*                 |                  |    |           |
| GHANA                 | 1  | GH0004            | Akuse<br>AGRIC<br>farms | 2010        |                |                | Y*             |                |                |                |                |                |                    |                  |    | 2         |
|                       | 2  | GH0007            | Akuse<br>AGRIC<br>farms | 2009        |                |                | Y*             |                |                |                |                |                |                    |                  |    |           |
| INTERNATIONAL         | 1  | 49D               | USA,<br>Arkansas        | 1985        |                |                |                | Y              |                |                |                |                |                    |                  |    | 32        |
|                       | 2  | 6360_1            | USA,<br>Texas           | 2010        |                |                |                |                |                |                |                |                | Y                  |                  |    |           |



767

768

769

770

771

772

773

774 **Table 2:** Description of isolates used in this study (a) Percentage of isolates from  
775 different SSA countries randomly chosen for GWA analyses (b) Percentage of isolates  
776 randomly chosen from each clade for GWA analyses.

777 (a)

| Region      | Country      | GWAS | Total isolates | %  |
|-------------|--------------|------|----------------|----|
| East Africa | Tanzania     | 17   | 20             | 15 |
|             | Kenya        | 7    | 28             | 35 |
|             | Uganda       | 4    | 5              | 76 |
| West Africa | Nigeria      | 14   | 17             | 61 |
|             | Burkina Faso | 14   | 36             | 25 |
|             | Benin        | 10   | 10             | 31 |
|             | Togo         | 7    | 7              | 80 |
|             | Mali         | 3    | 3              | 46 |
|             | Ghana        | 2    | 2              | 50 |
| Total       |              | 78   | 128            |    |

778

779 (b)

| Clade | GWAS | Total isolates | %  |
|-------|------|----------------|----|
| 1     | 17   | 20             | 85 |
| 2     | 7    | 28             | 25 |

|              |           |            |     |
|--------------|-----------|------------|-----|
| 3            | 4         | 5          | 80  |
| 4            | 14        | 17         | 82  |
| 5            | 14        | 36         | 39  |
| 6            | 10        | 10         | 100 |
| 7            | 7         | 7          | 100 |
| 8            | 3         | 3          | 100 |
| X            | 2         | 2          | 100 |
| <b>Total</b> | <b>78</b> | <b>128</b> |     |

780

781 **Table 3:** Description of rice cultivar panel used for GWAS and results of association  
782 analysis.

| Rice cultivar    | Description                       | Target R-gene | Donor Line/pedigree   | Association |
|------------------|-----------------------------------|---------------|-----------------------|-------------|
| 1. IRBLA-a       | Differential Line                 | <i>Pia</i>    | Aichi Asahi           | Yes         |
| 2. IRBLTA CP1    | Differential Line                 | <i>Pita</i>   | C101PKT               | Yes         |
| 3. IRBL3-CP4     | Differential Line                 | <i>Pi3</i>    | C104PKT               | Yes         |
| 4. IRBL 9-W      | Differential Line                 | <i>Pi9</i>    | WHD-1S-75-1-127       | Yes         |
| 5. IRBLK-KA      | Differential Line                 | <i>Pik</i>    | Kanto 51              | Yes         |
| 6. NERICA5       | African upland                    | -             | WAB450-11-1-1-P31-HB  | Yes         |
| 7. IRBLZT-T      | Differential Line                 | <i>Pizt</i>   | Toride-1              | No          |
| 8. IRBLZ5-CA (R) | Differential Line                 | <i>Piz-5</i>  | C101A51               | No          |
| 9. IRBLTA CT2    | Differential Line                 | <i>Pita</i>   | C105TTP2L9            | No          |
| 10. NERICA2      | African upland                    | -             | WAB450-11-1-P31-1-HB  | No          |
| 11. FKR62N       | African lowland                   | -             | WAS122-IDSA-1-WAS-6-1 | No          |
| 12. TS2          | African intraspecific             | -             | NA                    | No          |
| 13. F6-36        | African intraspecific             | -             | NA                    | No          |
| 14. UZROZ275     | susceptible check                 | -             | NA                    | No          |
| 15. 75-1-127     | <i>Pi9</i> donor line             | <i>Pi9</i>    | NA                    | No          |
| 16. AR105        | <i>Oryza glaberrima</i> (African) | -             | NA                    | No          |

783

784

785 **Table 4:** Putative virulence genes ( $n=16$ ) that occurred in the five rice blast disease  
786 associated GWA analyses.

| No. | Gene                                  | Gene ID          | IRBLT A CP1 ( <i>Pita</i> ) | IRBL A-a ( <i>Pia</i> ) | IRB L 9-W ( <i>Pi9</i> ) | IRBL 3-CP4 ( <i>Pi3</i> ) | NERICA 5 | Organism reported                                               | Reference                                                  |
|-----|---------------------------------------|------------------|-----------------------------|-------------------------|--------------------------|---------------------------|----------|-----------------------------------------------------------------|------------------------------------------------------------|
| 1   | AGC/RSK protein kinase                | <i>MGG_07012</i> | *                           | *                       | *                        | *                         | *        | <i>C. neoformans</i> , <i>C. albicans</i> , <i>A. fumigatus</i> | Lee <i>et al.</i> , 2016                                   |
| 2   | Rhamnogalacturonan lyase              | <i>MGG_06041</i> | *                           | *                       | *                        | *                         |          | <i>Magnaporthe oryzae</i>                                       | Quoc and Chau, 2017                                        |
| 3   | Secreted glucosidase                  | <i>MGG_10475</i> | *                           | *                       | *                        | *                         |          | <i>Multiple Fusarium graminearum</i>                            | Choi <i>et al.</i> , 2013                                  |
| 4   | MFS transporter                       | <i>MGG_10131</i> | *                           | *                       | *                        | *                         |          |                                                                 | Wang <i>et al.</i> , 2018                                  |
| 5   | Multidrug resistance protein fnx1     | <i>MGG_07444</i> | *                           | *                       | *                        | *                         |          | <i>Candida glabrata</i>                                         | Santos <i>et al.</i> , 2016                                |
| 6   | Nitrite reductase Alpha/beta          | <i>MGG_00634</i> | *                           | *                       | *                        | *                         |          | <i>Aspergillus nidulens</i> , <i>M.oryzae</i>                   | Baidya <i>et al.</i> , 2011; Samalova <i>et al.</i> , 2013 |
| 7   | hydrolase                             | <i>MGG_01903</i> | *                           | *                       | *                        | *                         |          | <i>Sclerotinia sclerotiorum</i>                                 | Seifbarghi <i>et al.</i> , 2017                            |
| 8   | Agglutinin isolectin 1                | <i>MGG_15185</i> | *                           | *                       | *                        | *                         |          | <i>Aspergillus fumigatus</i>                                    | Houser <i>et al.</i> , 2013                                |
| 9   | Lovastatin nonaketide synthase        | <i>MGG_05589</i> | *                           | *                       | *                        | *                         |          | <i>Aspergillus terreus</i>                                      | Collemare <i>et al.</i> , 2008                             |
| 10  | Dynamin GTPase                        | <i>MGG_04289</i> | *                           | *                       | *                        | *                         |          | <i>Magnaporthe oryzae</i>                                       | Zhong <i>et al.</i> , 2016                                 |
| 11  | rRNA-processing protein FCF2          | <i>MGG_00473</i> | *                           | *                       | *                        | *                         | *        |                                                                 |                                                            |
| 12  | Integral membrane protein             | <i>MGG_04629</i> | *                           | *                       | *                        | *                         |          |                                                                 |                                                            |
| 13  | Elongation factor 3                   | <i>MGG_14971</i> | *                           | *                       | *                        | *                         |          |                                                                 |                                                            |
| 14  | Ubiquitin C-terminal hydrolase        | <i>MGG_05996</i> | *                           | *                       |                          | *                         |          |                                                                 |                                                            |
| 15  | Stromal membrane-associated protein 1 | <i>MGG_04954</i> | *                           | *                       |                          | *                         |          |                                                                 |                                                            |
| 16  | Developmental regulator flbA          | <i>MGG_14517</i> | *                           | *                       |                          | *                         |          |                                                                 |                                                            |

787

788 **Table 5:** Genes/genomic regions with multiple SNPs associated with rice blast disease.

789 Highlighted genes were identified in five of the GWA analyses.

| Study                      | No. | Gene/Locus              | Homology                                                                     | No. of SNPs |
|----------------------------|-----|-------------------------|------------------------------------------------------------------------------|-------------|
| IRBLTA CP1 ( <i>Pita</i> ) | 1   | <b><i>MGG_10232</i></b> | <i>Magnaporthe oryzae</i> 70-15 hypothetical protein mRNA                    | 9           |
|                            | 2   | <b><i>MGG_07812</i></b> | <i>Magnaporthe oryzae</i> 70-15 hypothetical protein partial mRNA            | 4           |
|                            | 3   | <b><i>JQ929669</i></b>  | <i>Magnaporthe oryzae</i> strain Y34 repeat region                           | 4           |
|                            | 4   | <b><i>MGG_16548</i></b> | <i>Magnaporthe oryzae</i> 70-15 hypothetical protein partial mRNA            | 3           |
|                            | 5   | <b><i>MGG_17298</i></b> | <i>Magnaporthe oryzae</i> 70-15 hypothetical protein partial mRNA            | 4           |
|                            | 6   | <b><i>KT599263</i></b>  | <i>Magnaporthe oryzae</i> strain BM1-24 clone fosmid SK2054 genomic sequence | 2           |
|                            | 7   | <i>MGG_01018</i>        | <i>Magnaporthe oryzae</i> 70-15 hypothetical protein partial mRNA            | 2           |
|                            | 8   | <i>MGG_02059</i>        | <i>Magnaporthe oryzae</i> 70-15 hypothetical protein mRNA                    | 2           |
|                            | 9   | <i>MGG_07812</i>        | <i>Magnaporthe oryzae</i> 70-15 hypothetical protein partial mRNA            | 2           |
|                            | 10  | <i>MGG_04289</i>        | <i>Magnaporthe oryzae</i> 70-15 dynamin GTPase partial mRNA                  | 2           |
|                            | 11  | <i>MGG_14358</i>        | <i>Magnaporthe oryzae</i> 70-15 hypothetical protein partial mRNA            | 2           |
|                            | 12  | <i>MGG_15795</i>        | <i>Magnaporthe oryzae</i> 70-15 hypothetical protein partial mRNA            | 2           |
| IRBL3 CP4 ( <i>Pi3</i> )   | 1   | <b><i>MGG_10232</i></b> | <i>Magnaporthe oryzae</i> 70-15 hypothetical protein                         | 8           |

|                        |   |                   |                                                                              |   |
|------------------------|---|-------------------|------------------------------------------------------------------------------|---|
|                        | 2 | <b>MGG_07812</b>  | <i>Magnaporthe oryzae</i> 70-15 hypothetical protein partial mRNA            | 4 |
|                        | 3 | <b>JQ929669.1</b> | <i>Magnaporthe oryzae</i> strain Y34 repeat region                           | 4 |
|                        | 4 | <b>MGG_16548</b>  | <i>Magnaporthe oryzae</i> 70-15 hypothetical protein                         | 3 |
|                        | 5 | <b>MGG_17298</b>  | <i>Magnaporthe oryzae</i> 70-15 hypothetical protein                         | 4 |
|                        | 6 | <b>MGG_02369</b>  | <i>Magnaporthe oryzae</i> 70-15 hypothetical protein                         | 4 |
|                        | 7 | <b>MGG_00473</b>  | <i>Magnaporthe oryzae</i> 70-15 rRNA-processing protein                      | 3 |
|                        | 8 | <b>MGG_03564</b>  | <i>Magnaporthe oryzae</i> 70-15 mitochondrial RNA-splicing                   | 4 |
|                        | 9 | <b>MGG_17542</b>  | <i>Magnaporthe oryzae</i> 70-15 hypothetical protein mRNA                    | 4 |
| IRBLA-a ( <i>Pia</i> ) | 1 | <b>MGG_17298</b>  | <i>Magnaporthe oryzae</i> 70-15 hypothetical protein partial mRNA            | 4 |
|                        | 2 | <b>KT599263.1</b> | <i>Magnaporthe oryzae</i> strain BM1-24 clone fosmid SK2054 genomic sequence | 3 |
|                        | 3 | <b>MGG_02369</b>  | <i>Magnaporthe oryzae</i> 70-15 hypothetical protein partial mRNA            | 4 |
| IRBL9-W ( <i>Pi9</i> ) | 1 | <b>MGG_10232</b>  | <i>Magnaporthe oryzae</i> 70-15 hypothetical protein mRNA                    | 9 |
|                        | 2 | <b>MGG_07812</b>  | <i>Magnaporthe oryzae</i> 70-15 hypothetical protein partial mRNA            | 3 |
|                        | 3 | <b>MGG_16548</b>  | <i>Magnaporthe oryzae</i> 70-15 hypothetical protein partial mRNA            | 3 |
| NERICA5                | 1 | <b>MGG_16548</b>  | <i>Magnaporthe oryzae</i> 70-15 hypothetical protein partial mRNA            | 3 |

790

791

## 792 FIGURE CAPTIONS

### 793 **Figure 1: Genetic Diversity of *M. oryzae* isolates from sub-Saharan Africa (SSA)**

794 (A) Geographic origin of SSA field isolates and International comparator isolates. (B)  
 795 Unrooted neighbor-joining tree of *M. oryzae* isolates ( $n=160$ ) based on pair-wise  
 796 distance matrix calculated by TASSEL v5.0 (C) 3D Principal Component Analysis  
 797 scatter plot showing the first three components (PC1, PC2, and PC3). Colored lines  
 798 and color-filled circles represent SSA countries, black lines and filled black circles  
 799 represent International isolates (Table 1).

### 800 **Figure 2: Quantile-Quantile plots for the 6 GWA analyses using a generalized**

801 **linear model (GLM).** The x-axis corresponds to expected values of negative logarithm  
 802 of  $P$  and y-axis corresponds to observed values of negative logarithm of  $P$ . (A) Rice  
 803 blast differential rice line IRBL9-W harboring the R-gene *Pi9* (B) Rice blast differential  
 804 rice line IRBLK-KA harboring the R-gene *Pik* (C) Rice blast differential rice line IRBL3-  
 805 CP4 harboring the R-gene *Pi3* (D) Rice blast differential rice line IRBLTA-CP1 harboring



806 the R-gene *Pita* (E) African upland rice cultivar NERICA5 (F) Rice blast differential rice  
807 line IRBLA-a harboring the R-gene *Pia*. Dotted lines indicate  $-\log P$  cutoff.

808 **Figure 3: Number of rice blast disease-associated SNP markers identified in**  
809 **individual GWA analyses.** Fungal isolates show virulence on the respective rice  
810 cultivars shown. Five cultivars carry single major blast disease resistance genes.

811 **Figure 4: Distribution of SNP marker locations in different GWA analyses as**  
812 **predicted by NCBI's DNA database.** PG predicted genes; HP hypothetical protein; OT  
813 other, present in genomic sequences, repeat regions on genome; NS no similarity.

#### 814 **SUPPLEMENTARY DATA CAPTIONS**

815 **Supplementary Table S1:** List of Genes/Genomic region homologs that encompass  
816 the significantly associated SNPs (500bp upstream and downstream of SNP locations)  
817 in the GWA analysis of NERICA5

818 **Supplementary Table S2:** List of Genes/Genomic region homologs that encompass  
819 the significantly associated SNPs (500bp upstream and downstream of SNP locations)  
820 in the GWA analysis of IRBLA-a

821 **Supplementary Table S3:** List of Genes/Genomic region homologs that encompass  
822 the significantly associated SNPs (500bp upstream and downstream of SNP locations)  
823 in the GWA analysis of IRBLTA-CP1

824 **Supplementary Table S4:** List of Genes/Genomic region homologs that encompass  
825 the significantly associated SNPs (500bp upstream and downstream of SNP locations)  
826 in the GWA analysis of IRBL3-CP4

827 **Supplementary Table S5:** List of Genes/Genomic region homologs that encompass  
828 the significantly associated SNPs (500bp upstream and downstream of SNP locations)  
829 in the GWA analysis of IRBLK-KA

830 **Supplementary Table S6:** List of Genes/Genomic region homologs that encompass  
831 the significantly associated SNPs (500bp upstream and downstream of SNP locations)  
832 in the GWA analysis of IRBL-9W

833



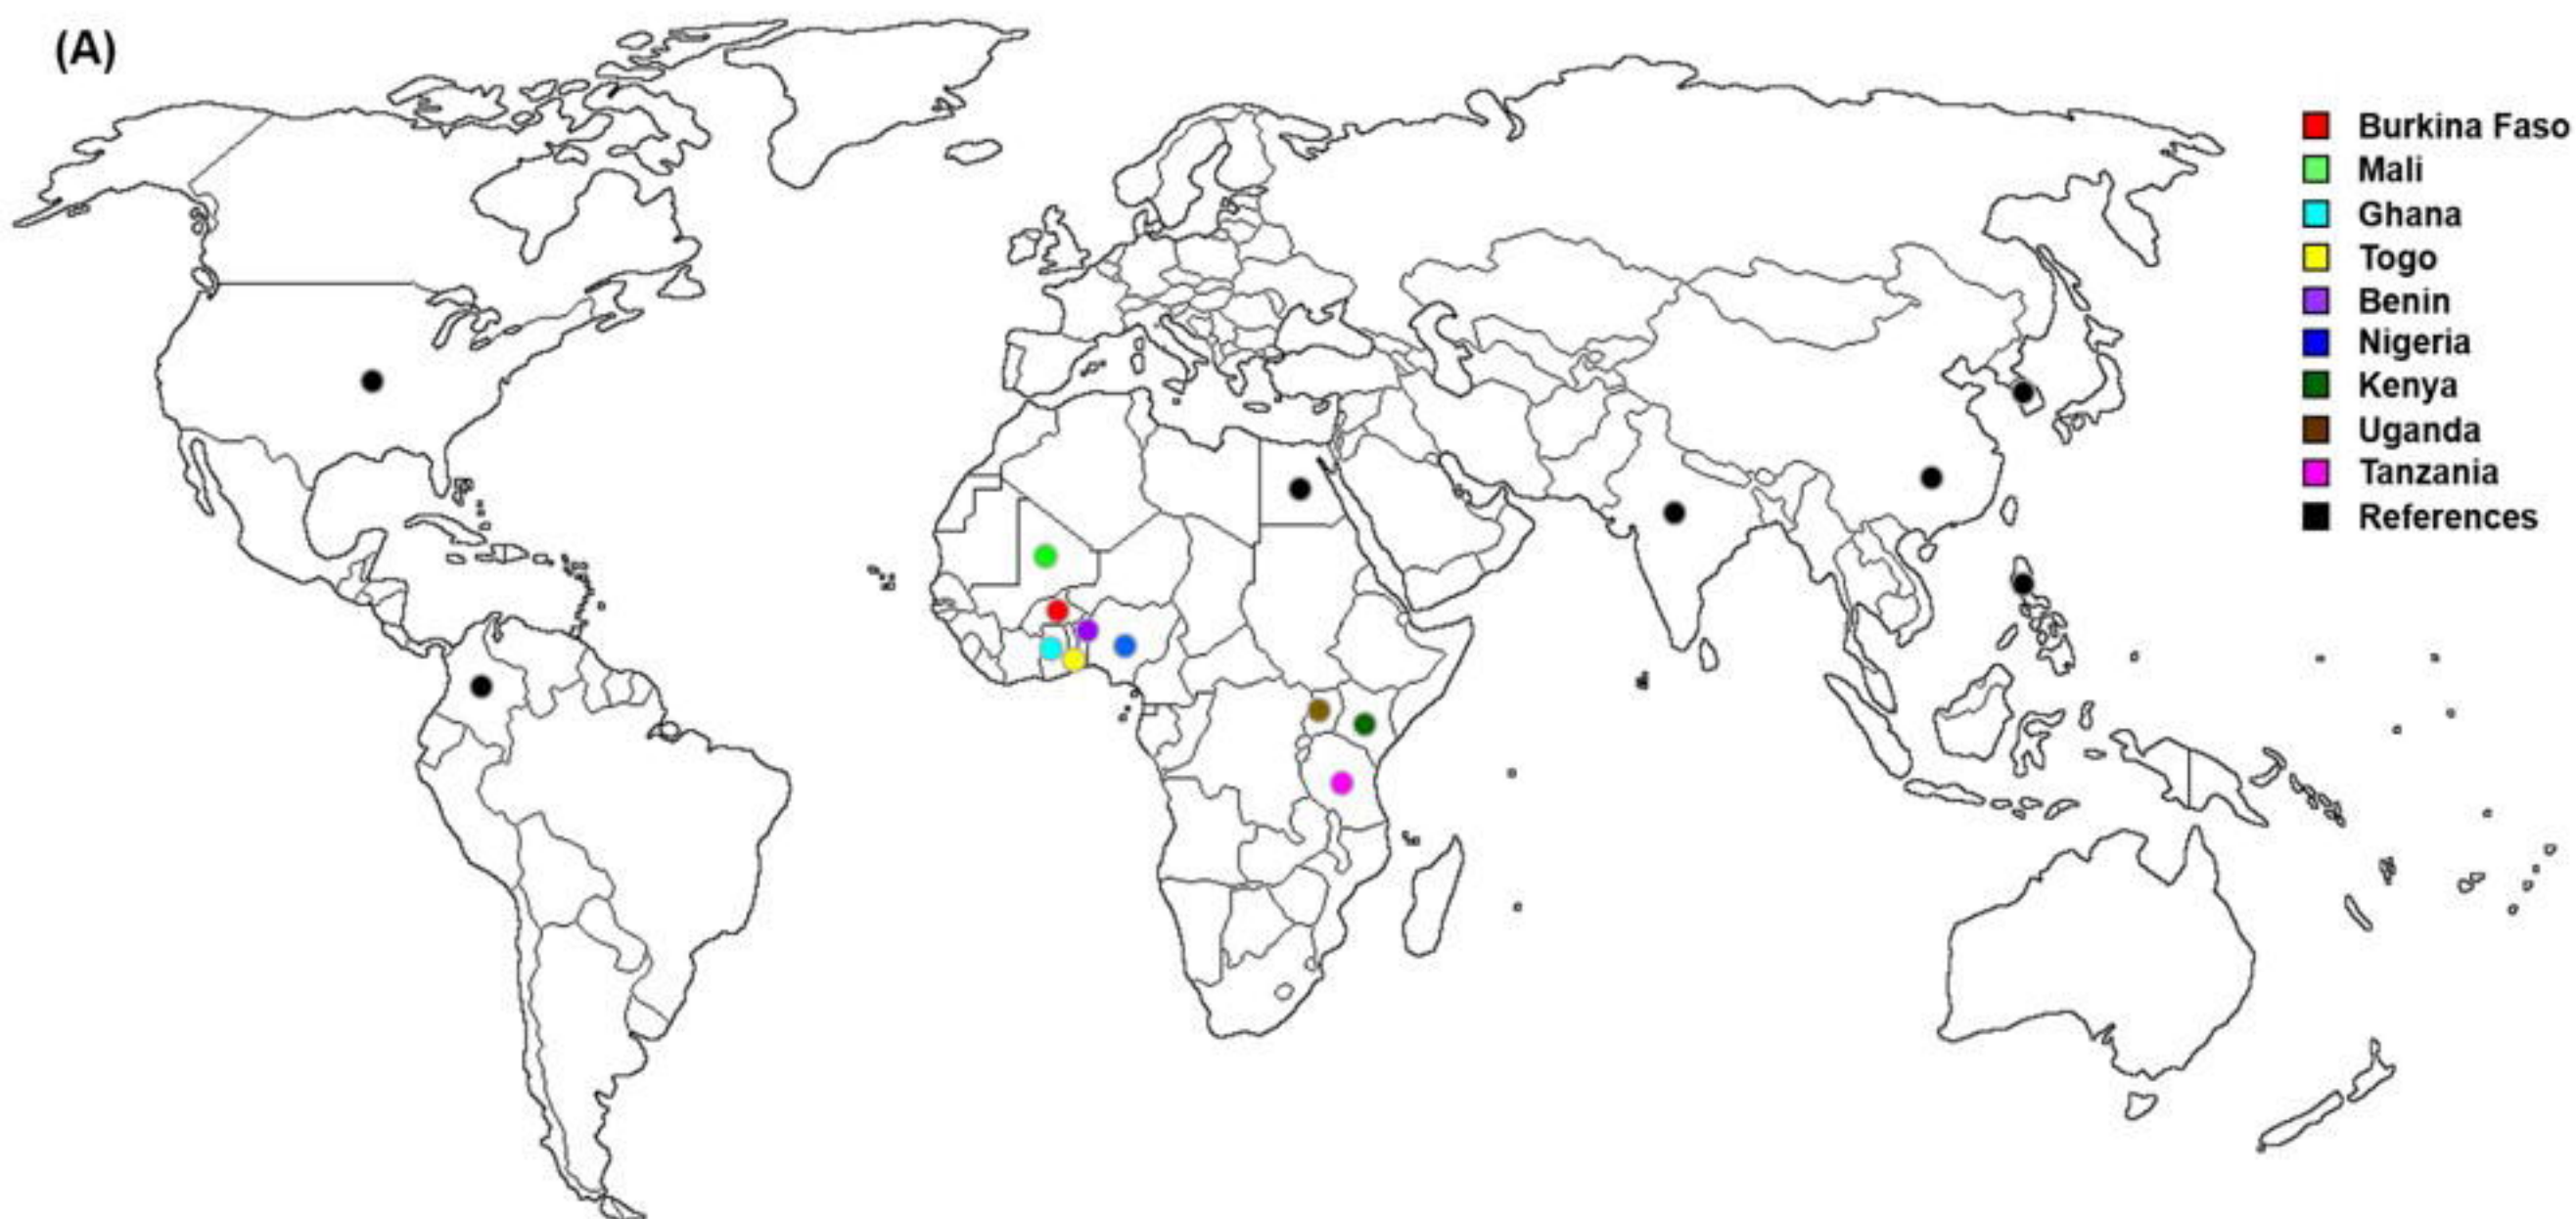

bioRxiv preprint doi: <https://doi.org/10.1101/418509>; this version posted September 14, 2018. The copyright holder for this preprint (which was not certified by peer review) is the author/funder. All rights reserved. No reuse allowed without permission.

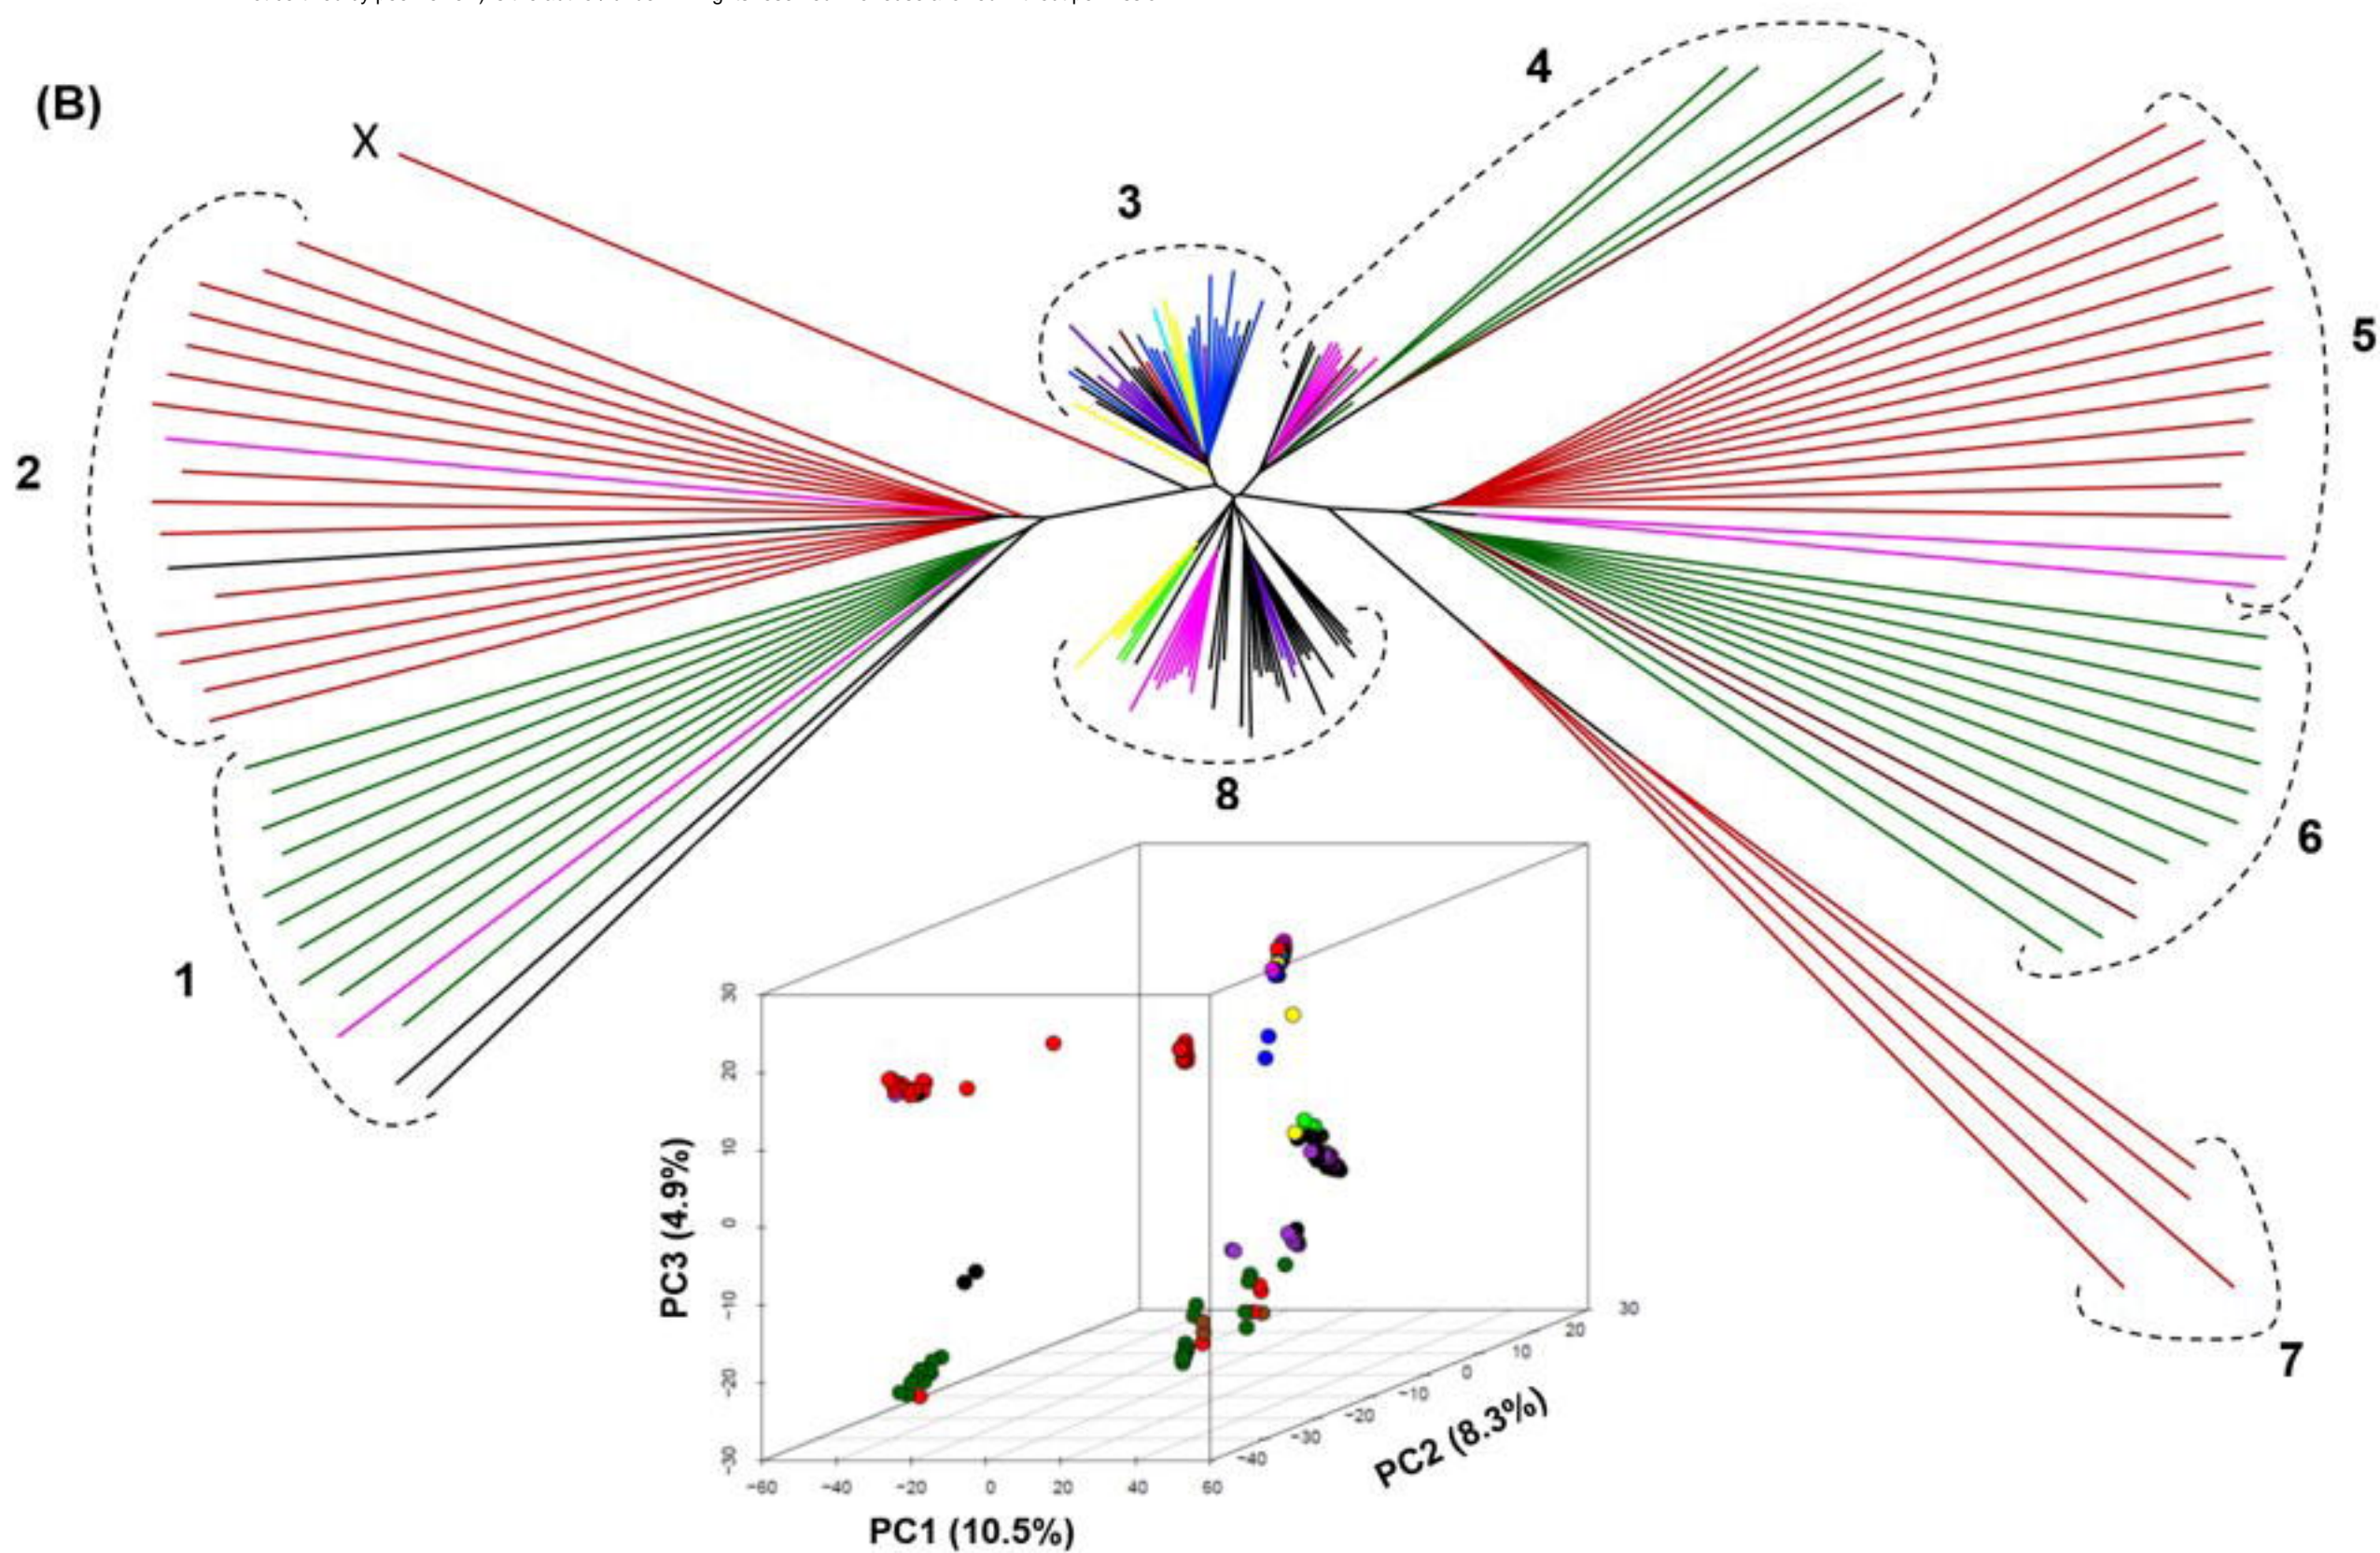

**Figure 1: Genetic Diversity of *M. oryzae* isolates from sub-Saharan Africa (SSA)** (A) Geographic origin of SSA field isolates and International comparator isolates. (B) Unrooted neighbor-joining tree of *M. oryzae* isolates ( $n=160$ ) based on pair-wise distance matrix calculated by TASSEL v5.0 (C) 3D Principal Component Analysis scatter plot showing the first three components (PC1, PC2, and PC3). Colored lines and color-filled circles represent SSA countries, black lines and filled black circles represent International isolates (Table 1).



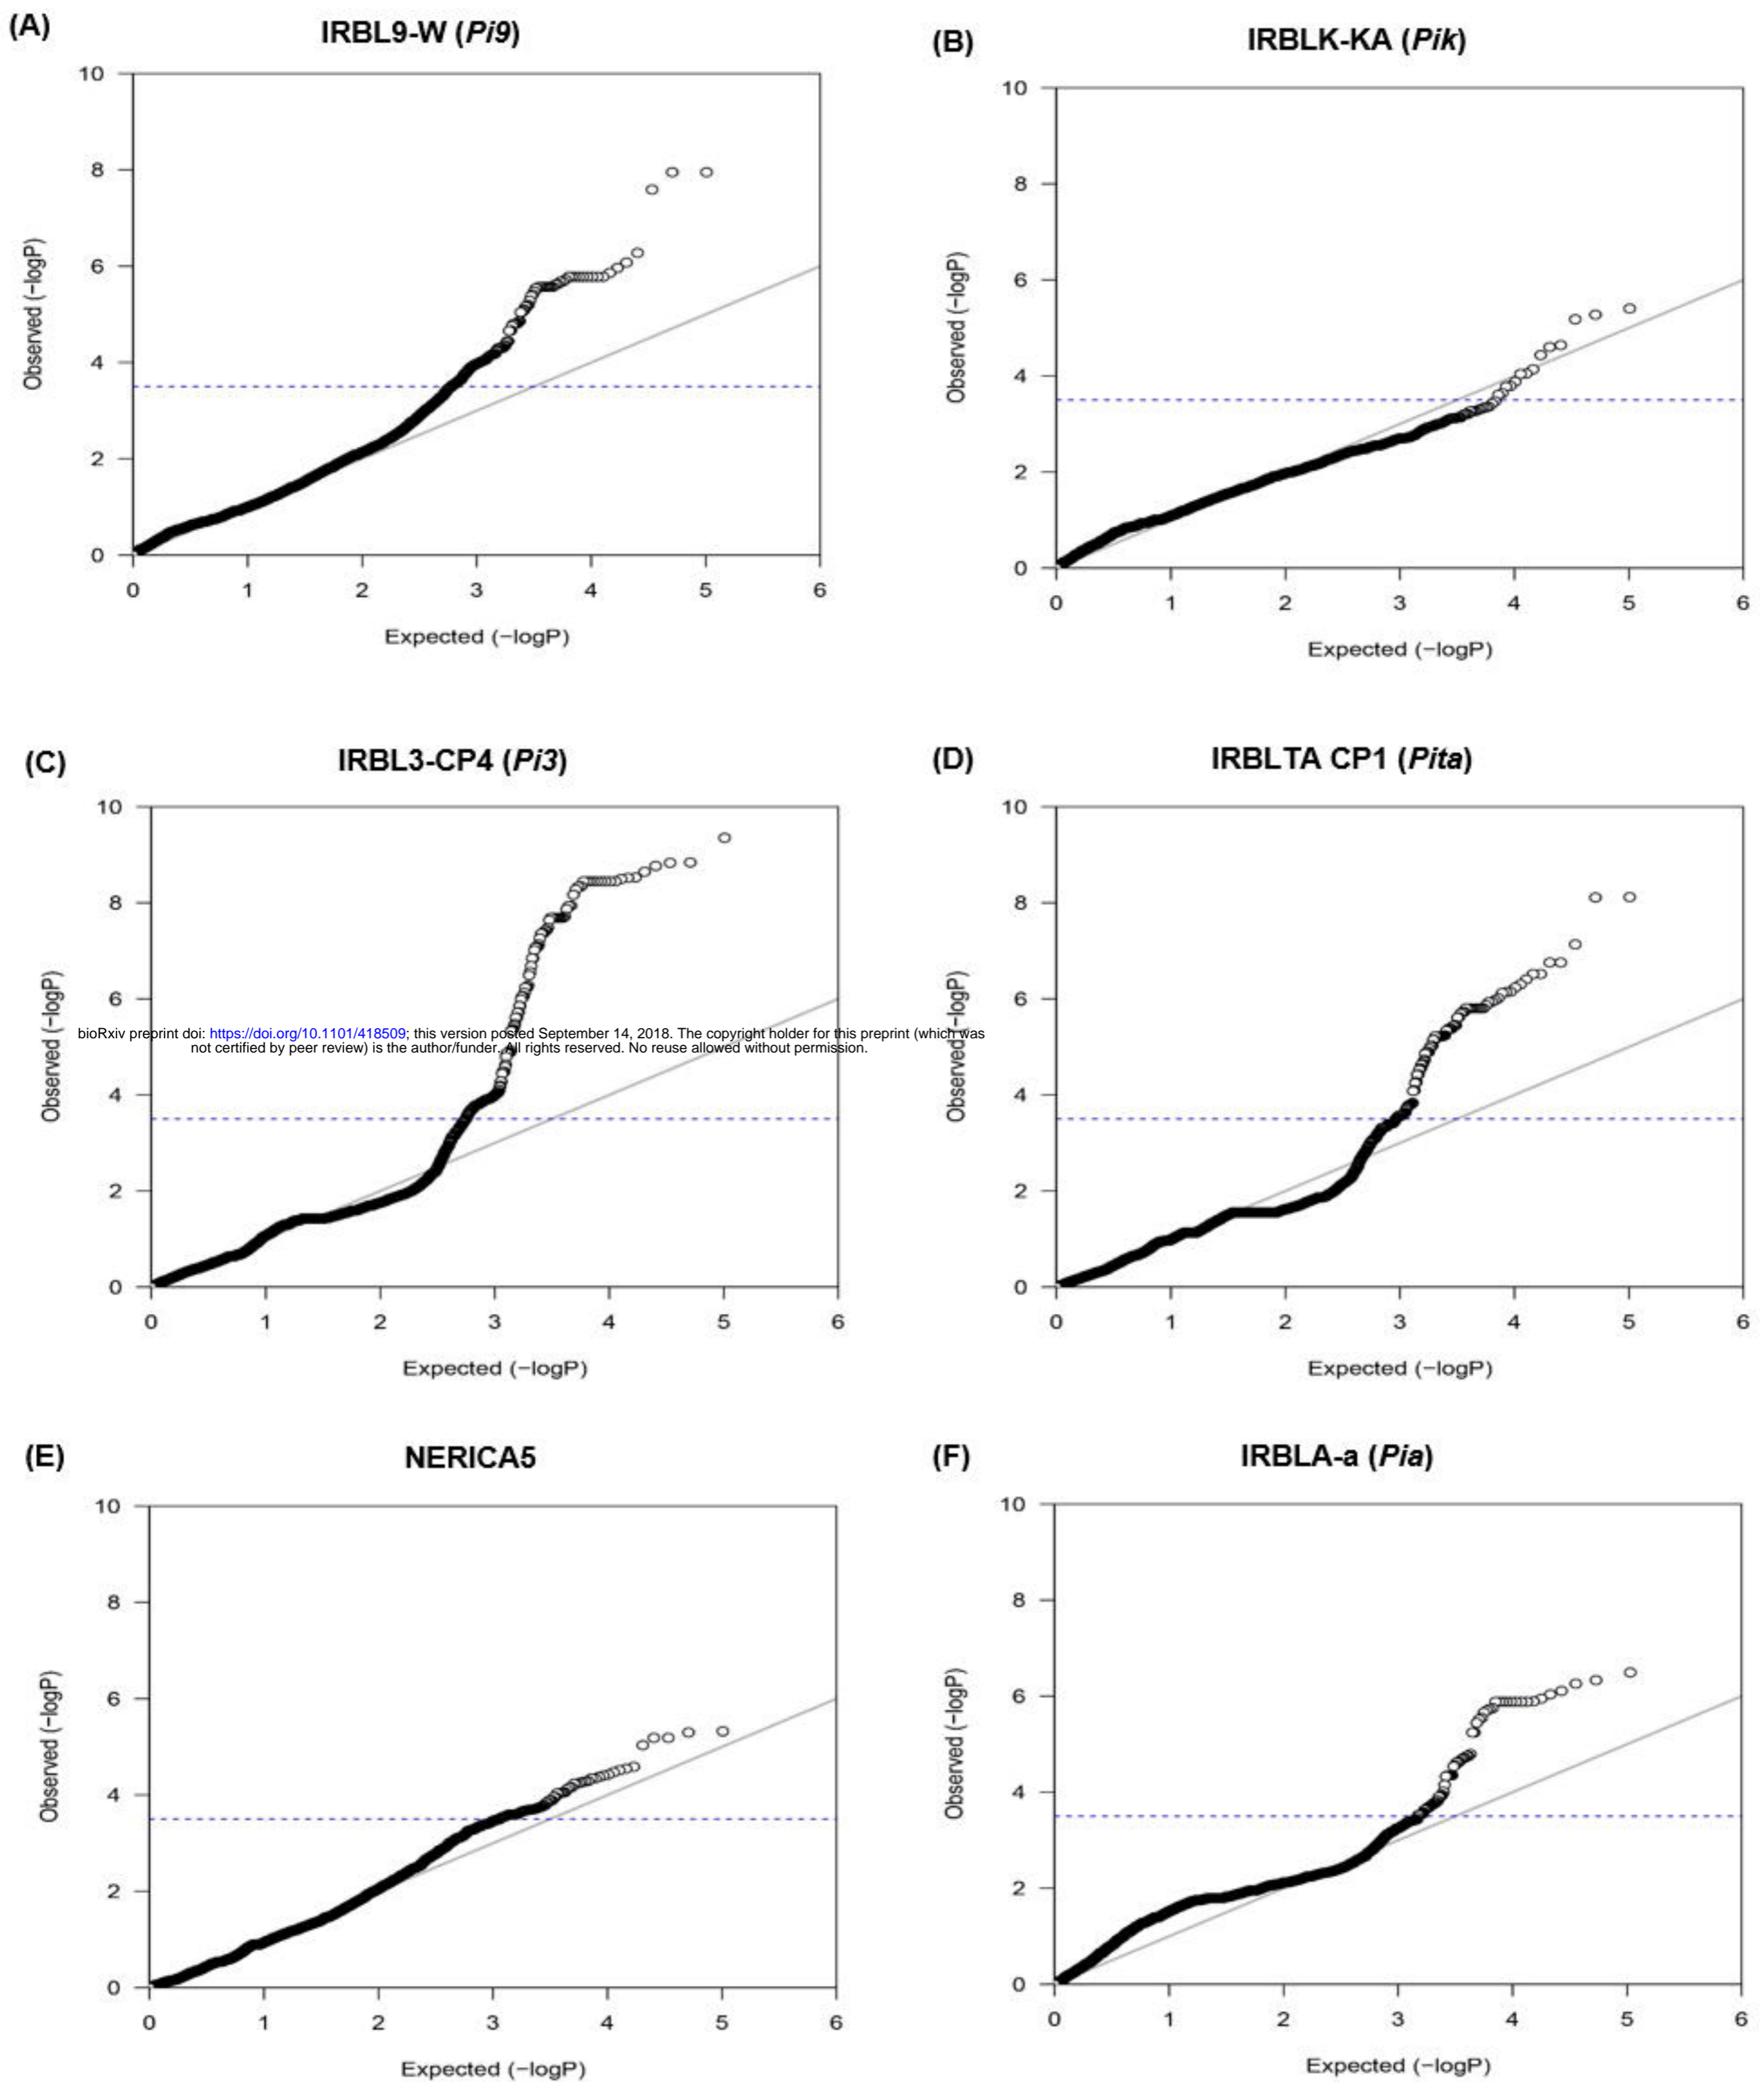

**Figure 2: Quantile-Quantile plots for the 6 GWA analyses using a generalized linear model (GLM).** The x-axis corresponds to expected values of negative logarithm of  $P$  and y-axis corresponds to observed values of negative logarithm of  $P$ . (A) Rice blast differential rice line IRBL9-W harboring the R-gene *Pi9* (B) Rice blast differential rice line IRBLK-KA harboring the R-gene *Pik* (C) Rice blast differential rice line IRBL3-CP4 harboring the R-gene *Pi3* (D) Rice blast differential rice line IRBLTA-CP1 harboring the R-gene *Pita* (E) African upland rice cultivar NERICA5 (F) Rice blast differential rice line IRBLA-a harboring the R-gene *Pia*. Blue dotted lines indicate  $-\log P$  cutoff.

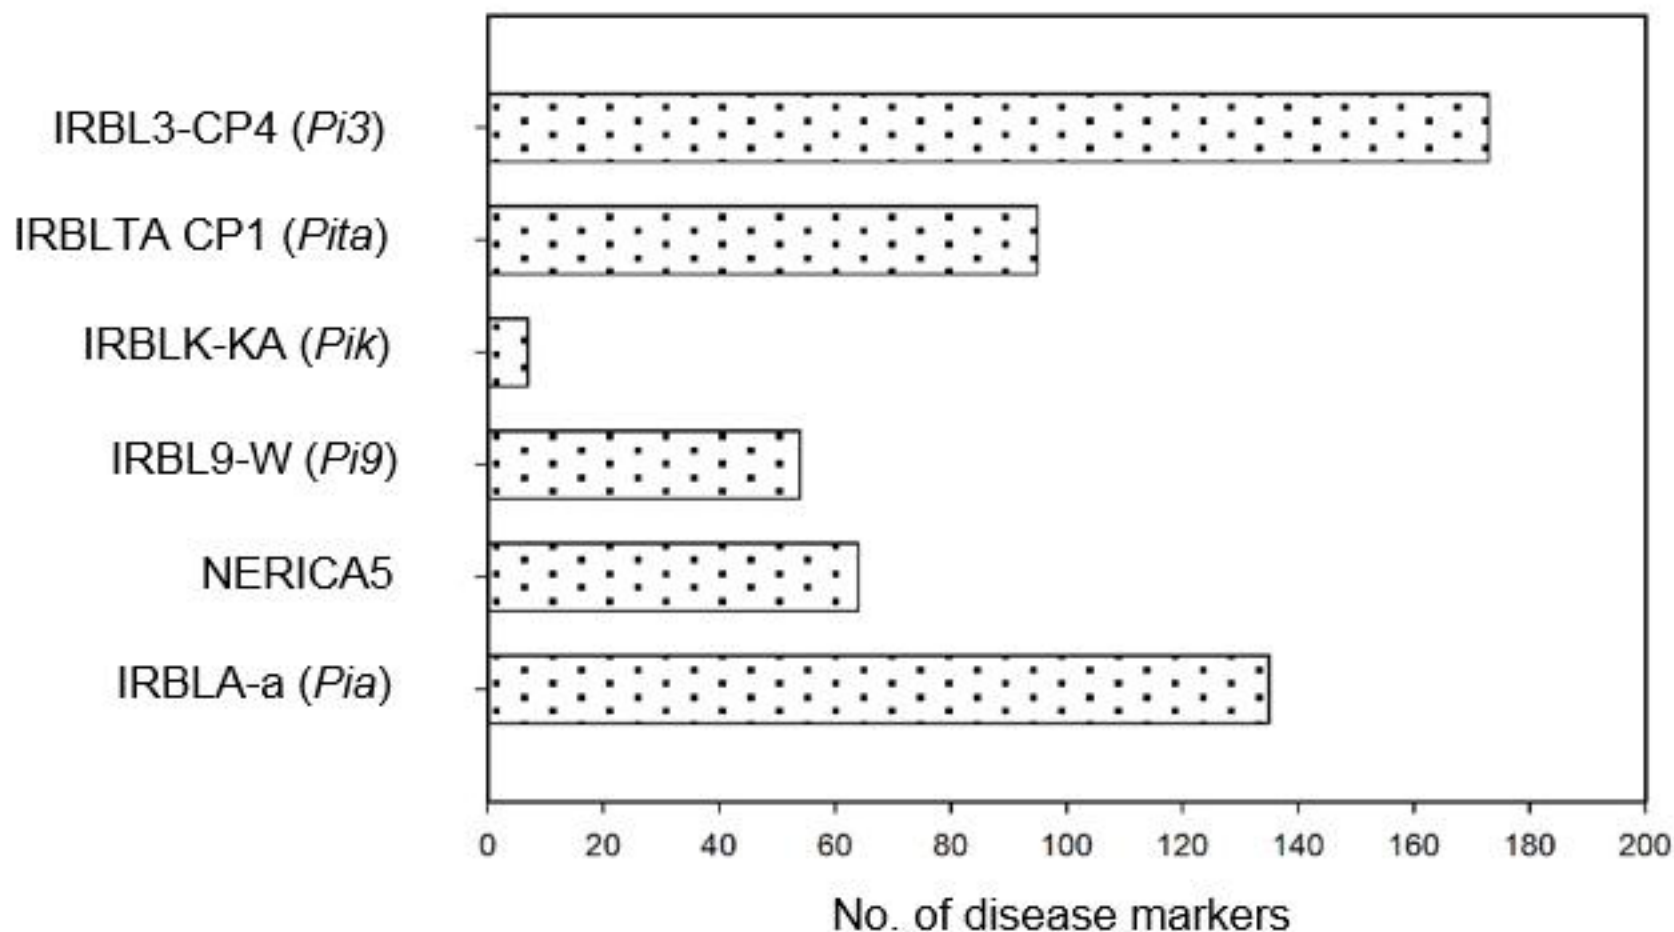

**Figure 3: Number of rice blast disease-associated SNP markers identified in individual GWA analyses.** Fungal isolates show virulence on the respective rice cultivars shown. Five cultivars carry single major blast disease resistance genes.



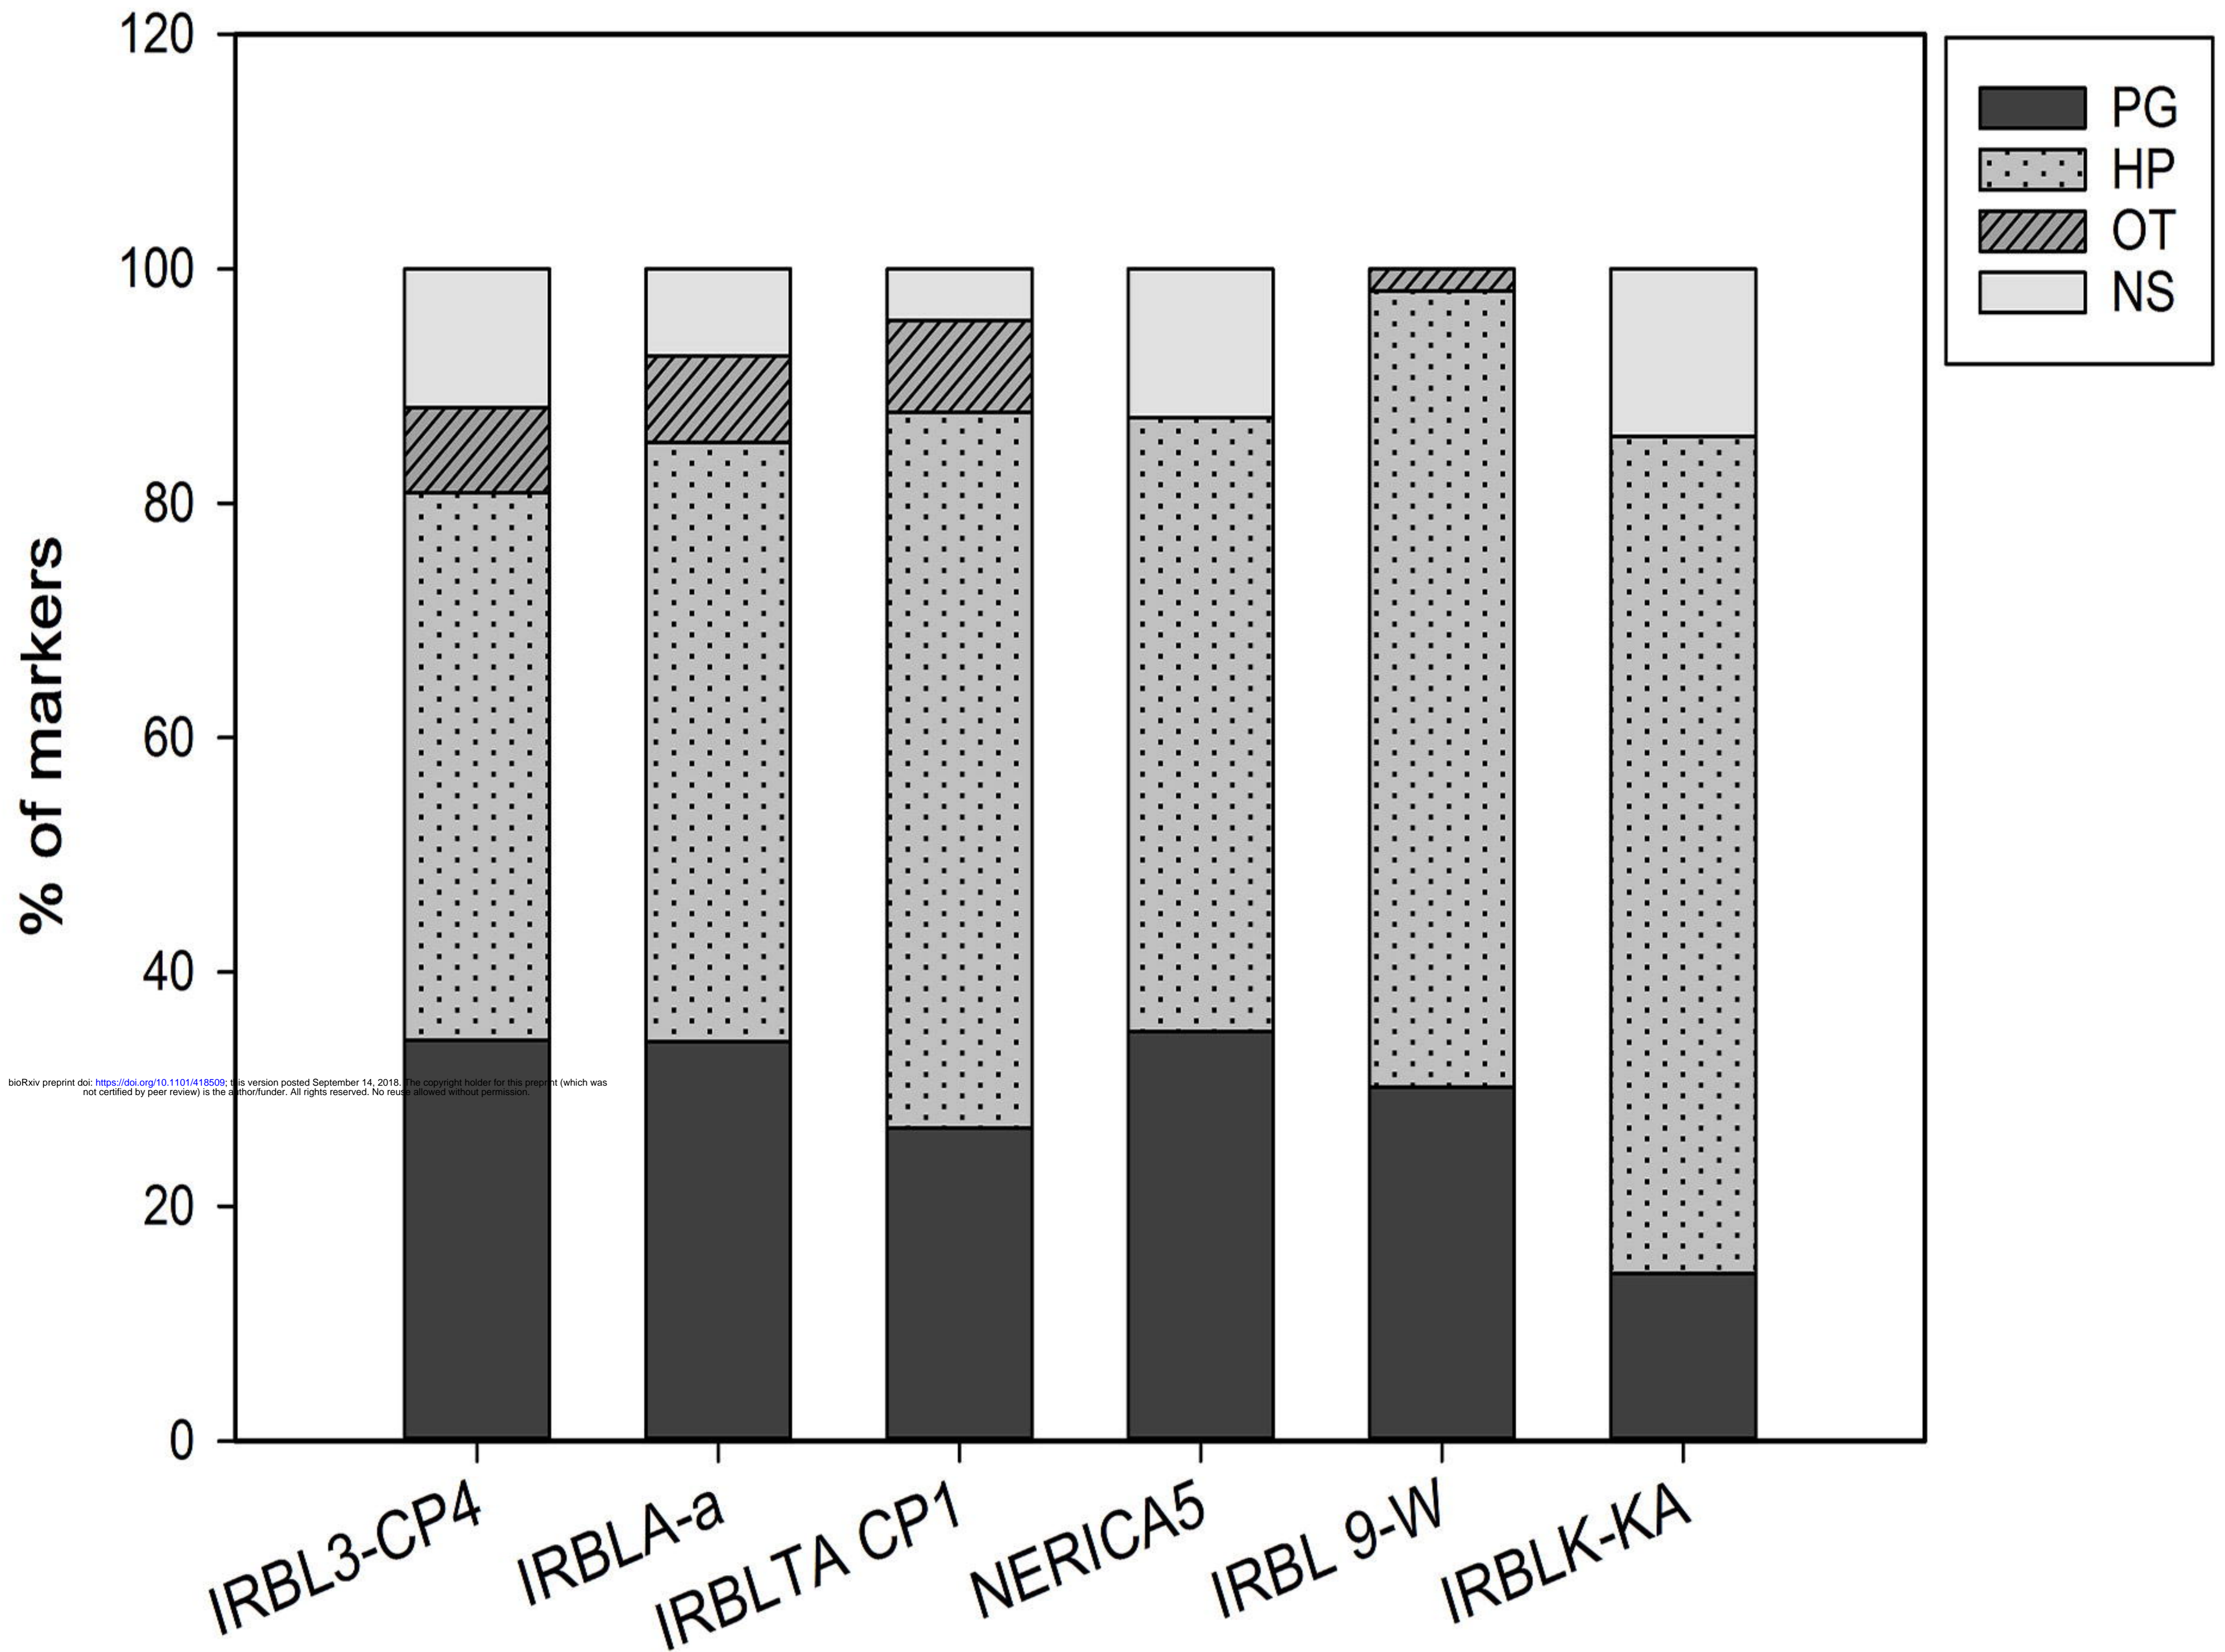

**Figure 4: Distribution of SNP marker locations in different GWA analyses as predicted by NCBI's DNA database.** PG predicted genes; HP hypothetical protein; OT other, present in genomic sequences, repeat regions on genome; NS no similarity.
